# Supplementary material for: Lignans and isoflavonoids from the stems of Pisonia umbellifera
Source: PubMed Central journal article supplement — RSC Adv. 2018 May 3;8(29):16383–91. doi: 10.1039/c8ra02240b (PMC9080244; doi:10.1039/c8ra02240b), 2018-05-03
Supplement: RA-008-C8RA02240B-s001.pdf [file RA-008-C8RA02240B-s001.pdf]

## Supporting Information

### Lignans and Isoflavonoids from the Stems of *Pisonia umbellifera*

Zhiguo Liu,<sup>†</sup> Xilong Zheng<sup>‡</sup>, Yanan Wang,<sup>§</sup> Mengyue Tang,<sup>†</sup> Shilin Chen,<sup>†</sup> Fangbo Zhang,<sup>†</sup> Li Li<sup>\*,§</sup>, Cun Zhang<sup>\*,†</sup> and Yi Sun<sup>\*,†</sup>

<sup>†</sup> Institute of Chinese Materia Medica, China Academy of Chinese Medical Sciences, Beijing 100700, China.

<sup>‡</sup> Hainan Branch Institute of Medical Plant Development, Chinese Academy of Medical Sciences, Wanning 571100, China

<sup>§</sup> Institute of Materia Medica, Chinese Academy of Medical Sciences & Peking Union Medical College, Beijing 100050, China

## **Table of Supplementary Tables**

**Table S1.** Main conformers (> 1%) of **1a** in methanol.

**Table S2.** Main conformers (> 1%) of **2a** in methanol.

**Table S3.** Main conformers (> 1%) of **3a** in methanol.

## **Table of Supplementary Figures**

**Figure S1.** <sup>1</sup>H NMR (600 MHz, CDCl<sub>3</sub>) spectrum of **1**

**Figure S2.** <sup>13</sup>C NMR (150 MHz, CDCl<sub>3</sub>) spectrum of **1**

**Figure S3.** HSQC (600 MHz, CDCl<sub>3</sub>) spectrum of **1**

**Figure S4.** HMBC (600 MHz, CDCl<sub>3</sub>) spectrum of **1**

**Figure S5.** H-H COSY (600 MHz, CDCl<sub>3</sub>) spectrum of **1**

**Figure S6.** NOESY (600 MHz, CDCl<sub>3</sub>) spectrum of **1**

**Figure S7.** HRESIMS spectrum of **1**

**Figure S8.** Chiral-phase HPLC analytical chromatogram of **1**

**Figure S9.** <sup>1</sup>H NMR (600 MHz, CDCl<sub>3</sub>) spectrum of **1a**

**Figure S10.** <sup>1</sup>H NMR (600 MHz, CDCl<sub>3</sub>) spectrum of **1b**

**Figure S11.** Experimental ECD spectra of **1a**

**Figure S12.** Experimental ECD spectra of **1b**

**Figure S13.** <sup>1</sup>H NMR (600 MHz, MeOD) spectrum of **2**

**Figure S14.** <sup>13</sup>C NMR (150 MHz, MeOD) spectrum of **2**

**Figure S15.** HSQC (600 MHz, MeOD) spectrum of **2**

**Figure S16.** HMBC (600 MHz, MeOD) spectrum of **2**

**Figure S17.** H-H COSY (600 MHz, MeOD) spectrum of **2**

**Figure S18.** NOESY (600 MHz, CDCl<sub>3</sub>) spectrum of **2**

**Figure S19.** HRESIMS spectrum of **2**

**Figure S20.** Chiral-phase HPLC analytical chromatogram of **2**

**Figure S21.** <sup>1</sup>H NMR (600 MHz, MeOD) spectrum of **2a**

**Figure S22.** <sup>1</sup>H NMR (600 MHz, MeOD) spectrum of **2b**

**Figure S23.** Experimental ECD spectra of **2a**

**Figure S24.** Experimental ECD spectra of **2b**

**Figure S25.**  $^1\text{H}$  NMR (600 MHz, MeOD) spectrum of **3**

**Figure S26.**  $^{13}\text{C}$  NMR (150 MHz, MeOD) spectrum of **3**

**Figure S27.** HSQC (600 MHz, MeOD) spectrum of **3**

**Figure S28.** HMBC (600 MHz, MeOD) spectrum of **3**

**Figure S29.** H-H COSY (600 MHz, MeOD) spectrum of **3**

**Figure S30.** NOESY (600 MHz,  $\text{CDCl}_3$ ) spectrum of **3**

**Figure S31.** HRESIMS spectrum of **3**

**Figure S32.** Chiral-phase HPLC analytical chromatogram of **3**

**Figure S33.**  $^1\text{H}$  NMR (600 MHz, MeOD) spectrum of **3a**

**Figure S34.**  $^1\text{H}$  NMR (600 MHz, MeOD) spectrum of **3b**

**Figure S35.** Experimental ECD spectra of **3a**

**Figure S36.** Experimental ECD spectra of **3b**

**Figure S37.**  $^1\text{H}$  NMR (600 MHz,  $\text{CDCl}_3$ ) spectrum of **5**

**Figure S38.**  $^{13}\text{C}$  NMR (150 MHz,  $\text{CDCl}_3$ ) spectrum of **5**

**Figure S39.** HSQC (600 MHz,  $\text{CDCl}_3$ ) spectrum of **5**

**Figure S40.** HMBC (600 MHz,  $\text{CDCl}_3$ ) spectrum of **5**

**Figure S41.** H-H COSY (600 MHz,  $\text{CDCl}_3$ ) spectrum of **5**

**Figure S42.** NOESY (600 MHz,  $\text{CDCl}_3$ ) spectrum of **5**

**Figure S43.** HRESIMS spectrum of **5**

**Figure S44.**  $^1\text{H}$  NMR (600 MHz,  $\text{CDCl}_3$ ) spectrum of **6**

**Figure S45.**  $^{13}\text{C}$  NMR (150 MHz,  $\text{CDCl}_3$ ) spectrum of **6**

**Figure S46.** HSQC (600 MHz,  $\text{CDCl}_3$ ) spectrum of **6**

**Figure S47.** HMBC (600 MHz,  $\text{CDCl}_3$ ) spectrum of **6**

**Figure S48.** H-H COSY (600 MHz,  $\text{CDCl}_3$ ) spectrum of **6**

**Figure S49.** NOESY (600 MHz,  $\text{CDCl}_3$ ) spectrum of **6**

**Figure S50.** HRESIMS spectrum of **6**

**Figure S51.**  $^1\text{H}$  NMR (600 MHz,  $\text{CDCl}_3$ ) spectrum of **7**

**Figure S52.**  $^{13}\text{C}$  NMR (150 MHz,  $\text{CDCl}_3$ ) spectrum of **7**

**Figure S53.** HSQC (600 MHz, CDCl<sub>3</sub>) spectrum of **7**  
**Figure S54.** HMBC (600 MHz, CDCl<sub>3</sub>) spectrum of **7**  
**Figure S55.** H-H COSY (600 MHz, CDCl<sub>3</sub>) spectrum of **7**  
**Figure S56.** NOESY (600 MHz, CDCl<sub>3</sub>) spectrum of **7**  
**Figure S57.** HRESIMS spectrum of **7**  
**Figure S58.** <sup>1</sup>H NMR (600 MHz, CDCl<sub>3</sub>) spectrum of **8**  
**Figure S59.** <sup>13</sup>C NMR (150 MHz, CDCl<sub>3</sub>) spectrum of **8**  
**Figure S60.** HSQC (600 MHz, CDCl<sub>3</sub>) spectrum of **8**  
**Figure S61.** HMBC (600 MHz, CDCl<sub>3</sub>) spectrum of **8**  
**Figure S62.** H-H COSY (600 MHz, CDCl<sub>3</sub>) spectrum of **8**  
**Figure S63.** NOESY (600 MHz, CDCl<sub>3</sub>) spectrum of **8**  
**Figure S64.** HRESIMS spectrum of **8**  
**Figure S65.** <sup>1</sup>H NMR (600 MHz, CDCl<sub>3</sub>) spectrum of **9**  
**Figure S66.** <sup>13</sup>C NMR (150 MHz, CDCl<sub>3</sub>) spectrum of **9**  
**Figure S67.** HSQC (600 MHz, CDCl<sub>3</sub>) spectrum of **9**  
**Figure S68.** HMBC (600 MHz, CDCl<sub>3</sub>) spectrum of **9**  
**Figure S69.** H-H COSY (600 MHz, CDCl<sub>3</sub>) spectrum of **9**  
**Figure S70.** NOESY (600 MHz, CDCl<sub>3</sub>) spectrum of **9**  
**Figure S71.** HRESIMS spectrum of **9**  
**Figure S72.** <sup>1</sup>H NMR (600 MHz, CDCl<sub>3</sub>) spectrum of **10**  
**Figure S73.** <sup>13</sup>C NMR (150 MHz, CDCl<sub>3</sub>) spectrum of **10**  
**Figure S74.** HSQC (600 MHz, CDCl<sub>3</sub>) spectrum of **10**  
**Figure S75.** HMBC (600 MHz, CDCl<sub>3</sub>) spectrum of **10**  
**Figure S76.** H-H COSY (600 MHz, CDCl<sub>3</sub>) spectrum of **10**  
**Figure S77.** NOESY (600 MHz, CDCl<sub>3</sub>) spectrum of **10**  
**Figure S78.** HRESIMS spectrum of **10**

**Table S1.** Main conformers (> 1%) of **1a** in methanol.

|                                                                                   |                                                                                   |                                                                                    |                                                                                     |
|-----------------------------------------------------------------------------------|-----------------------------------------------------------------------------------|------------------------------------------------------------------------------------|-------------------------------------------------------------------------------------|
| 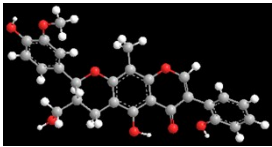 |  |  |  |
| <b>1a C1</b> (22.23%)                                                             | <b>1a C2</b> (21.41%)                                                             | <b>1a C3</b> (18.01%)                                                              | <b>1a C4</b> (17.46%)                                                               |
|  |  |  |  |
| <b>1a C5</b> (5.94%)                                                              | <b>1a C6</b> (5.90%)                                                              | <b>1a C7</b> (3.51%)                                                               | <b>1a C8</b> (3.33%)                                                                |

**Table S2.** Main conformers (> 1%) of **2a** in methanol.

|                                                                                     |                                                                                     |                                                                                      |                                                                                       |
|-------------------------------------------------------------------------------------|-------------------------------------------------------------------------------------|--------------------------------------------------------------------------------------|---------------------------------------------------------------------------------------|
| 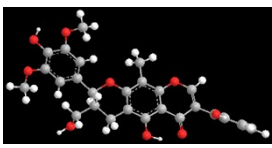 |  |  |  |
| <b>2a C1</b> (34.12%)                                                               | <b>2a C2</b> (16.89%)                                                               | <b>2a C3</b> (7.40%)                                                                 | <b>2a C4</b> (7.31%)                                                                  |
|  |  |  |  |
| <b>2a C5</b> (4.32%)                                                                | <b>2a C6</b> (4.23%)                                                                | <b>2a C7</b> (3.71%)                                                                 | <b>2a C8</b> (3.19%)                                                                  |
|  |  |  |  |
| <b>2a C9</b> (3.03%)                                                                | <b>2a C10</b> (2.15%)                                                               | <b>2a C11</b> (2.02%)                                                                | <b>2a C12</b> (1.96%)                                                                 |

|                                                                                   |                                                                                   |                                                                                    |                                                                                     |
|-----------------------------------------------------------------------------------|-----------------------------------------------------------------------------------|------------------------------------------------------------------------------------|-------------------------------------------------------------------------------------|
| 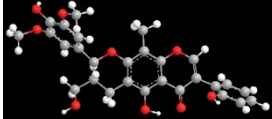 |  |  |  |
| <b>2a C13</b> (1.21%)                                                             | <b>2a C14</b> (1.08%)                                                             | <b>2a C15</b> (1.08%)                                                              | <b>2a C16</b> (1.07%)                                                               |

**Table S3.** Main conformers (> 1%) of **3a** in methanol.

|                                                                                     |                                                                                     |                                                                                      |                                                                                       |
|-------------------------------------------------------------------------------------|-------------------------------------------------------------------------------------|--------------------------------------------------------------------------------------|---------------------------------------------------------------------------------------|
| 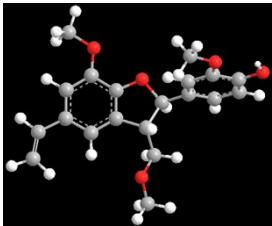   |    |    |    |
| <b>3a C1</b> (5.66%)                                                                | <b>3a C2</b> (5.47%)                                                                | <b>3a C3</b> (4.67%)                                                                 | <b>3a C4</b> (4.50%)                                                                  |
|   |   |   |   |
| <b>3a C5</b> (4.49%)                                                                | <b>3a C6</b> (4.41%)                                                                | <b>3a C7</b> (4.27%)                                                                 | <b>3a C8</b> (4.27%)                                                                  |
|  |  |  |  |
| <b>3a C9</b> (4.00%)                                                                | <b>3a C10</b> (3.92%)                                                               | <b>3a C11</b> (3.65%)                                                                | <b>3a C12</b> (3.64%)                                                                 |
|  |  |  |  |
| <b>3a C13</b> (3.61%)                                                               | <b>3a C14</b> (3.43%)                                                               | <b>3a C15</b> (3.38%)                                                                | <b>3a C16</b> (3.07%)                                                                 |

|                                                                                    |                                                                                   |                                                                                    |                                                                                     |
|------------------------------------------------------------------------------------|-----------------------------------------------------------------------------------|------------------------------------------------------------------------------------|-------------------------------------------------------------------------------------|
| 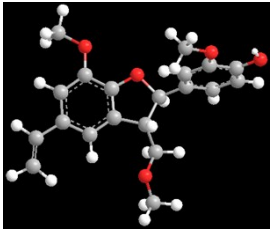  |  |  |  |
| <b>3a C17 (2.95%)</b>                                                              | <b>3a C18 (2.46%)</b>                                                             | <b>3a C19 (2.45%)</b>                                                              | <b>3a C20 (1.88%)</b>                                                               |
|   |  |  |  |
| <b>3a C21 (1.82%)</b>                                                              | <b>3a C22 (1.54%)</b>                                                             | <b>3a C23 (1.32%)</b>                                                              | <b>3a C24 (1.15%)</b>                                                               |
|  |                                                                                   |                                                                                    |                                                                                     |
| <b>3a C25 (1.04%)</b>                                                              |                                                                                   |                                                                                    |                                                                                     |

**Figure S1.**  $^1\text{H}$  NMR (600 MHz,  $\text{CDCl}_3$ ) spectrum of **1**

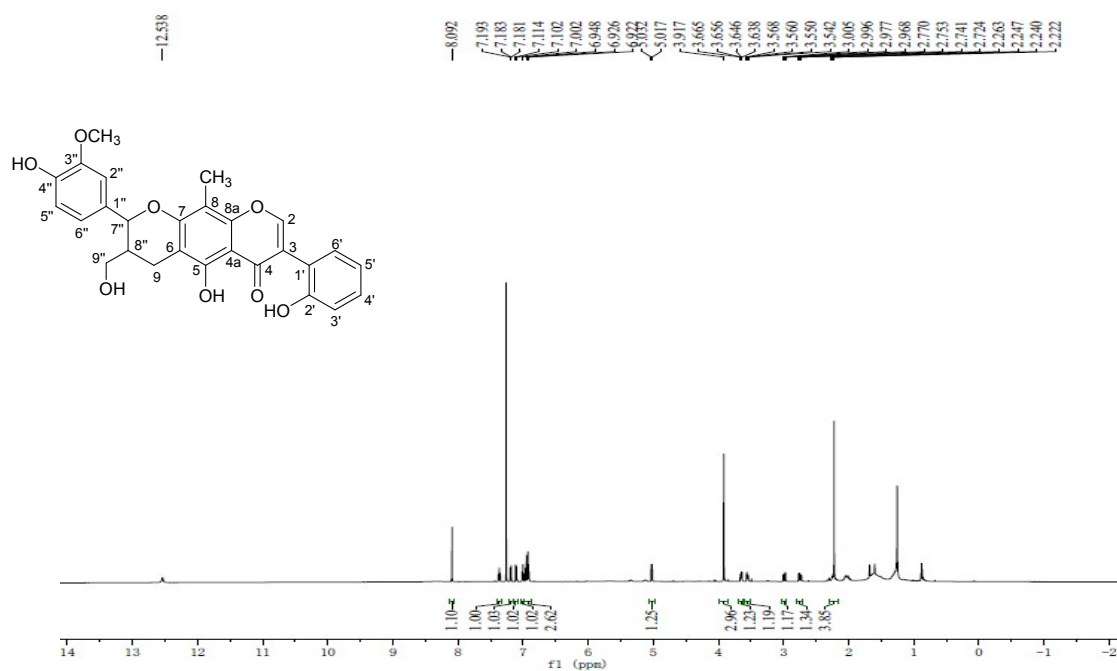

**Figure S2.**  $^{13}\text{C}$  NMR (150 MHz,  $\text{CDCl}_3$ ) spectrum of **1**

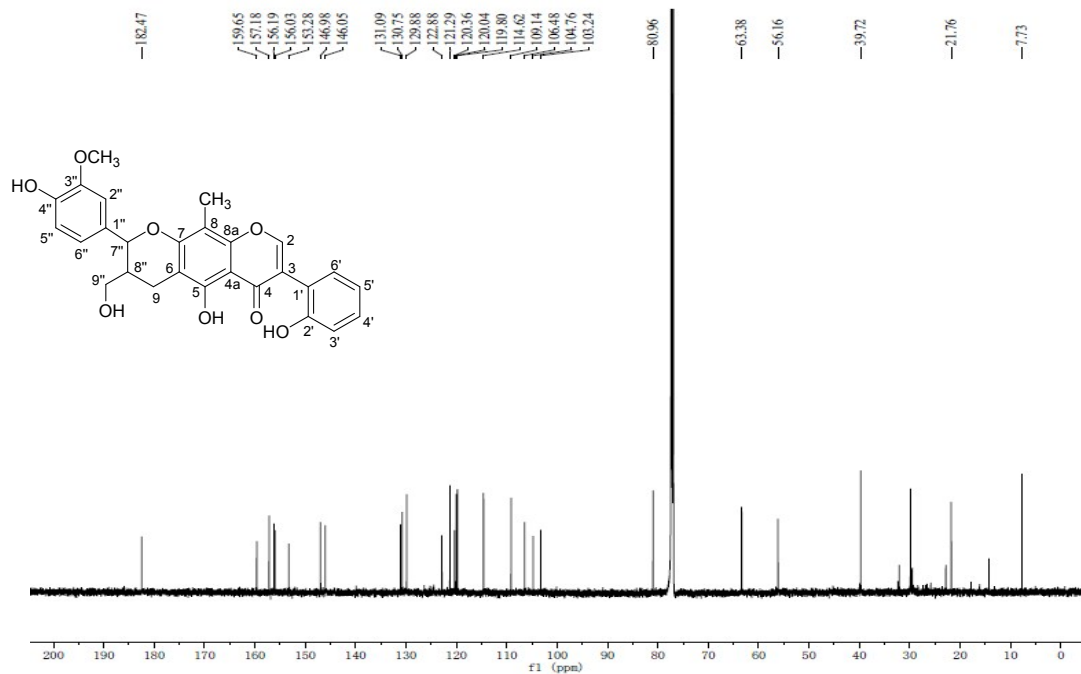



**Figure S3.** HSQC (600 MHz, CDCl<sub>3</sub>) spectrum of **1**

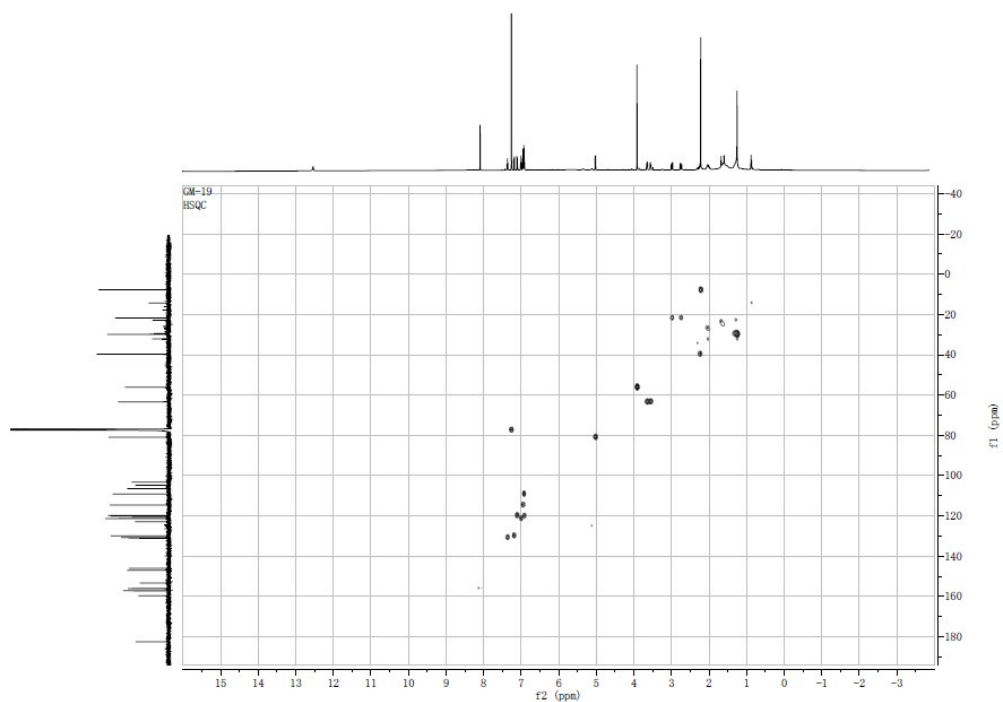

**Figure S4.** HMBC (600 MHz, CDCl<sub>3</sub>) spectrum of **1**

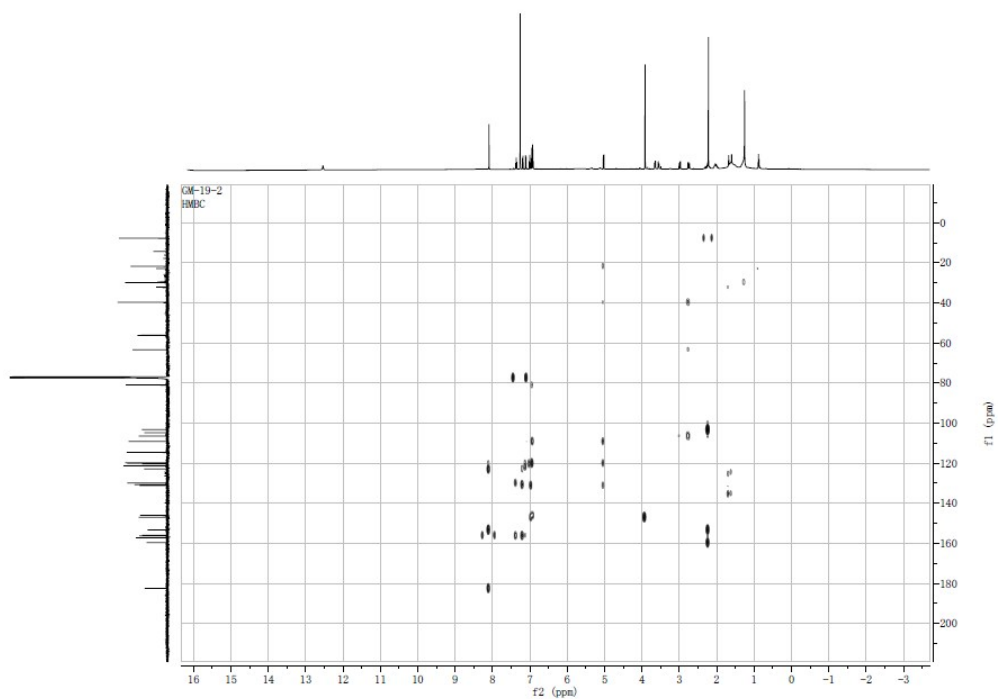

**Figure S5.** H-HCOSY (600 MHz, CDCl<sub>3</sub>) spectrum of **1**

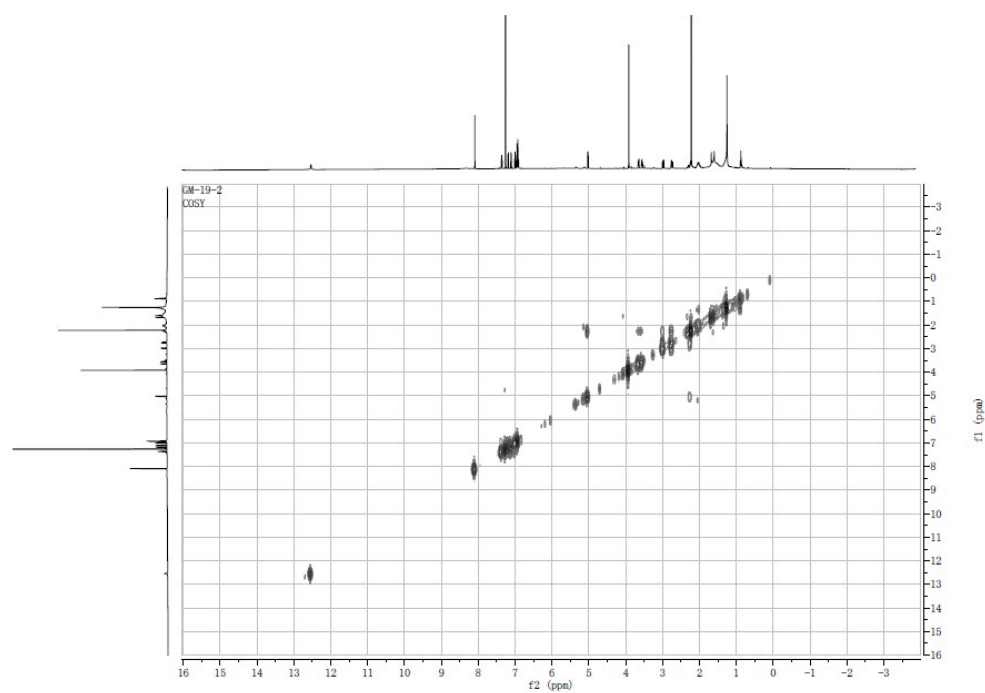

**Figure S6.** NOESY (600 MHz, CDCl<sub>3</sub>) spectrum of **1**

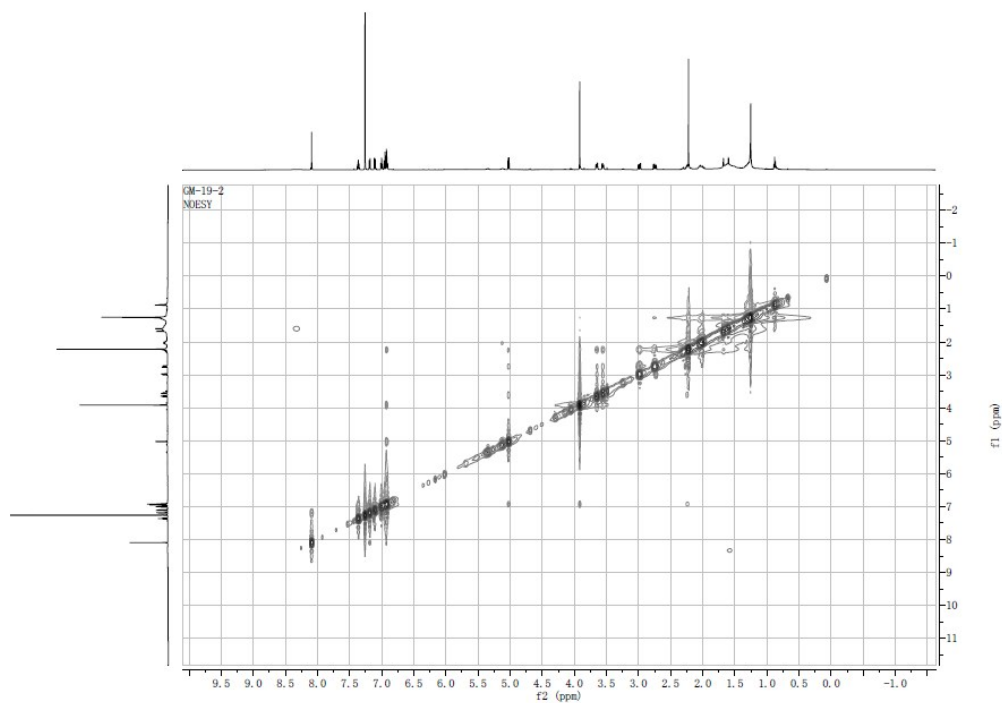

**Figure S7.** HRESIMS spectrum of **1**

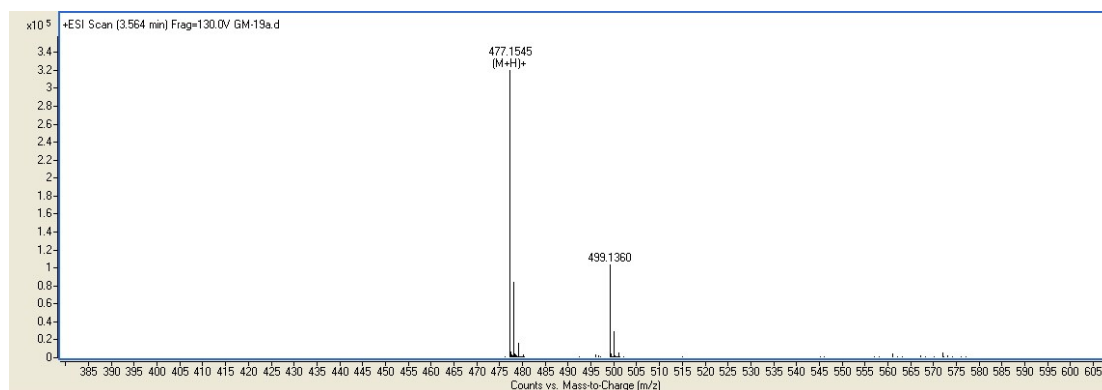

| No.      | Formula           | Ion Formula       | Measured m/z | Calc m/z | ppm  |
|----------|-------------------|-------------------|--------------|----------|------|
| <b>1</b> | $C_{27}H_{24}O_8$ | $C_{27}H_{25}O_8$ | 477.1545     | 477.1544 | 0.21 |

**Figure S8.** Chiral-phase HPLC analytical chromatogram of **1**

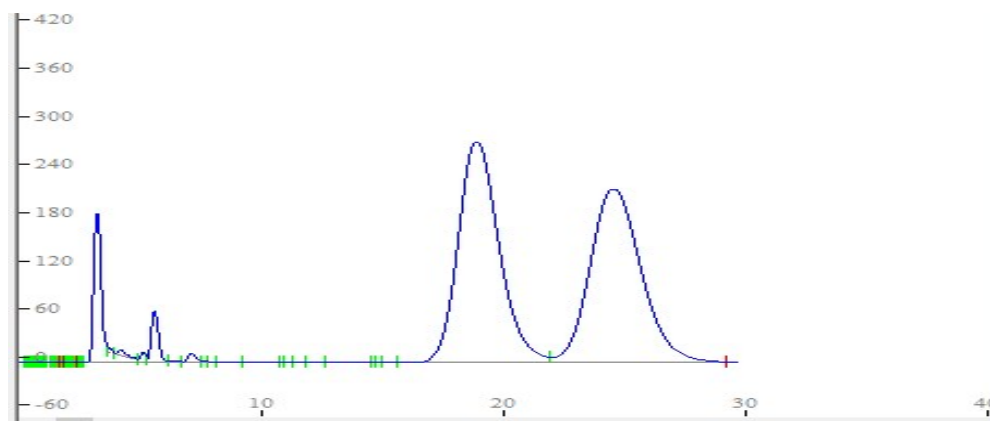

**Figure S9.**  $^1\text{H}$  NMR (600 MHz,  $\text{CDCl}_3$ ) spectrum of **1a**

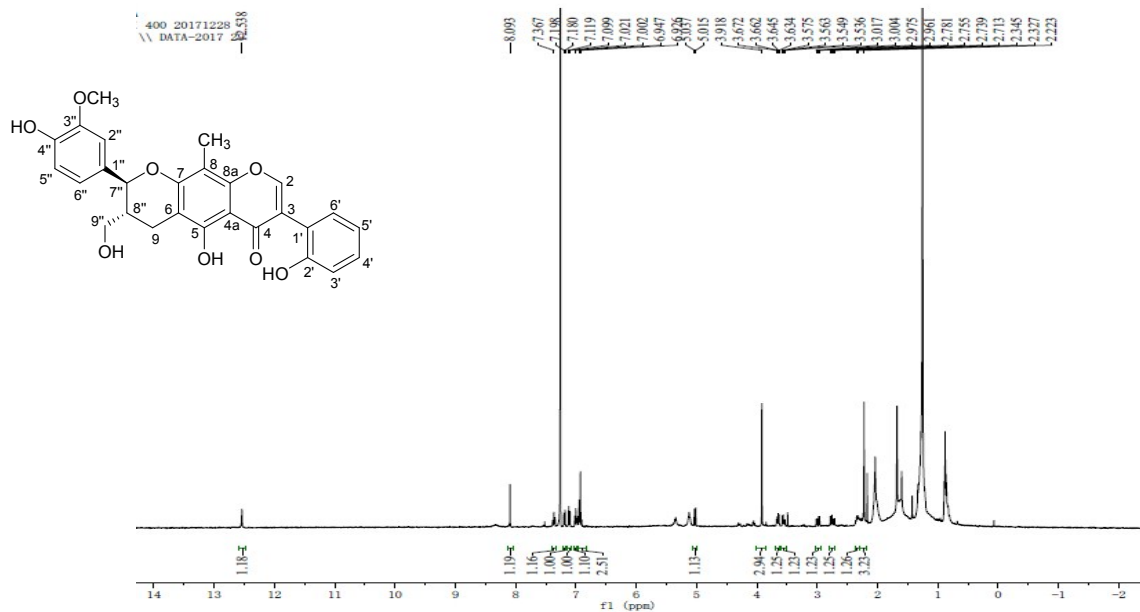

**Figure S10.**  $^1\text{H}$  NMR (600 MHz,  $\text{CDCl}_3$ ) spectrum of **1b**

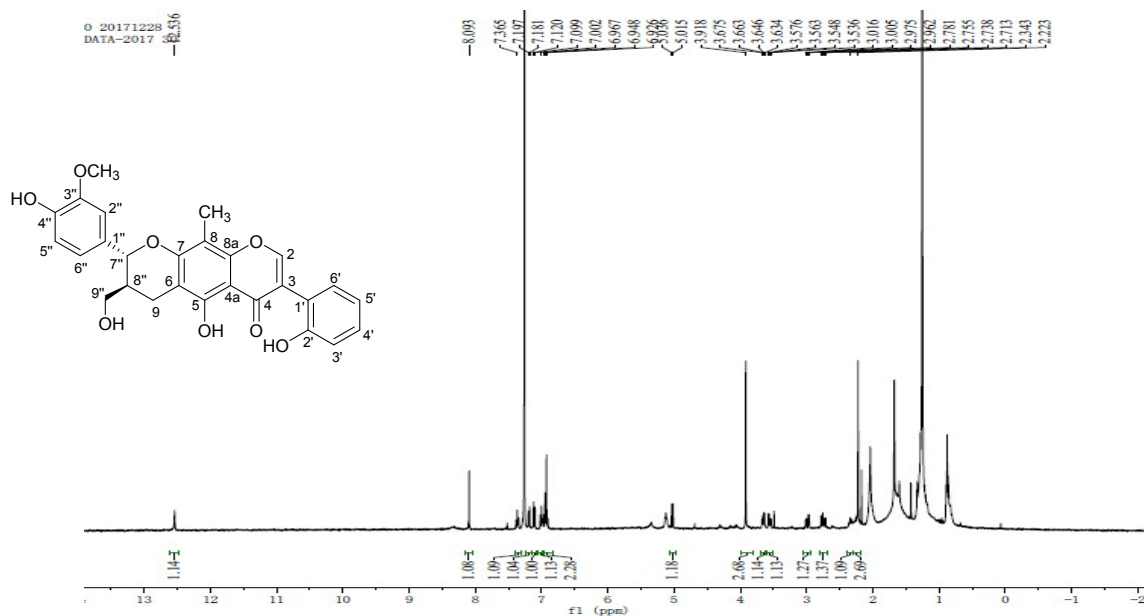

**Figure S11.** Experimental ECD spectra of **1a**

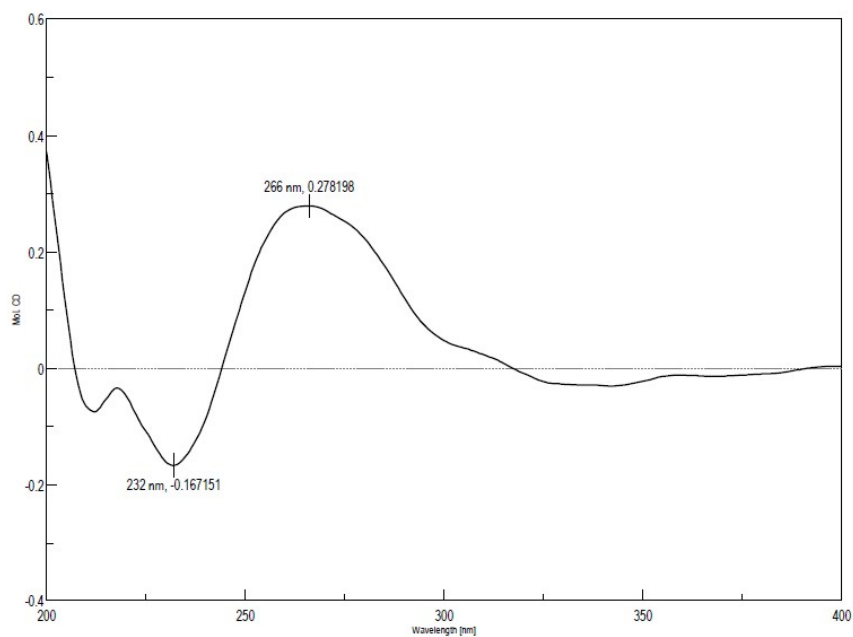

**Figure S12.** Experimental ECD spectra of **1b**

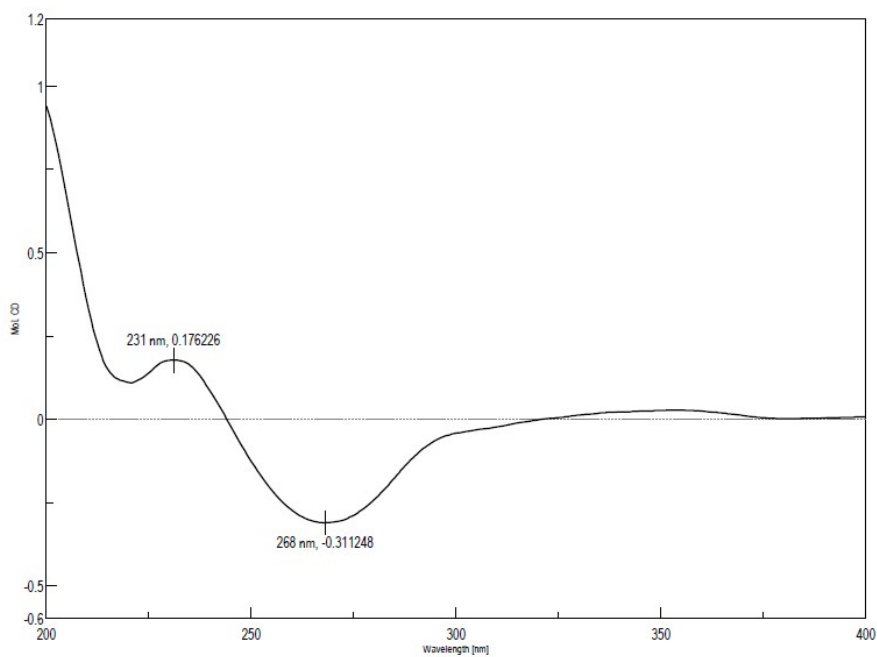

**Figure S13.** <sup>1</sup>H NMR (600 MHz, MeOD) spectrum of **2**

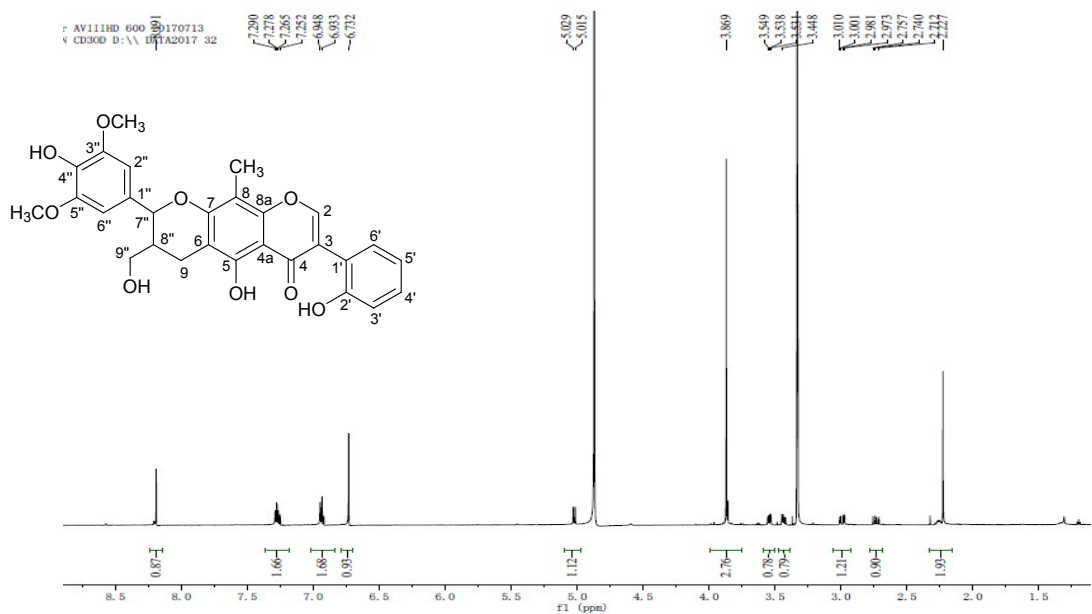

**Figure S14.**  $^{13}\text{C}$  NMR (150 MHz, MeOD) spectrum of **2**

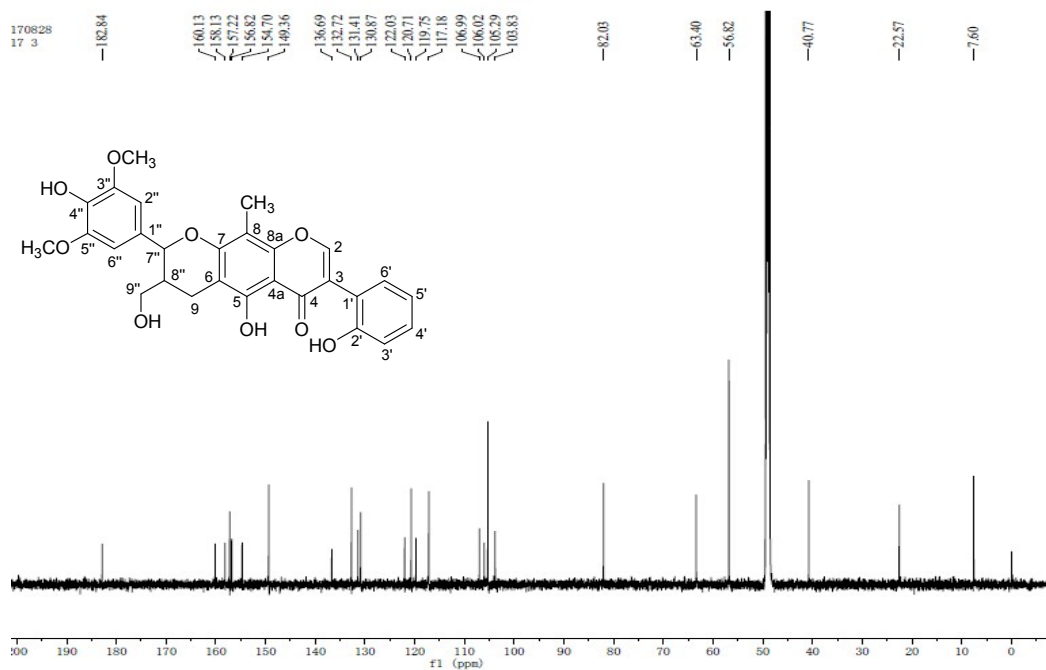

**Figure S15.** HSQC (600 MHz, MeOD) spectrum of **2**

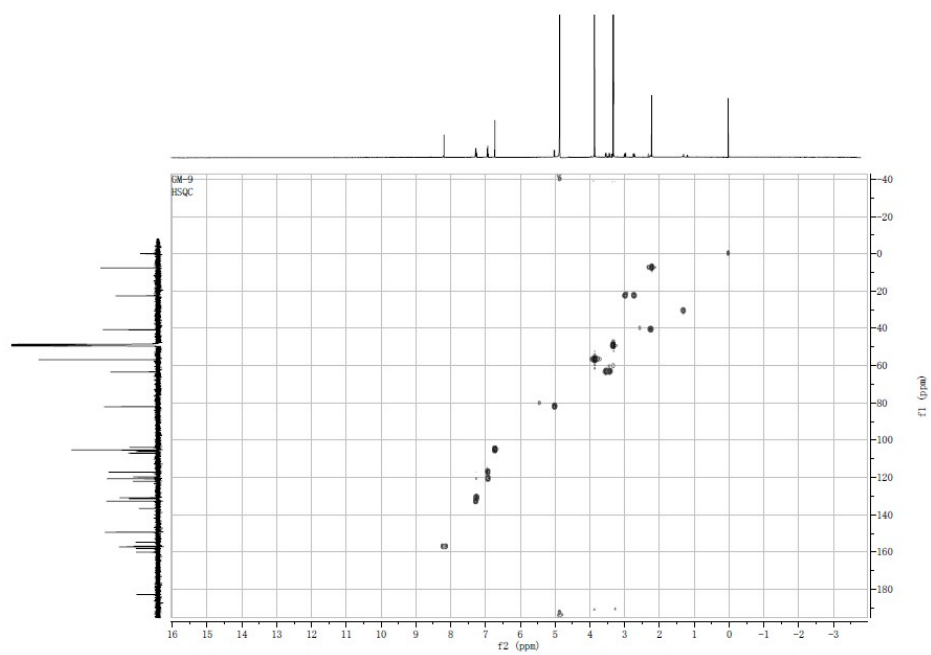

**Figure S16.** HMBC (600 MHz, MeOD) spectrum of **2**

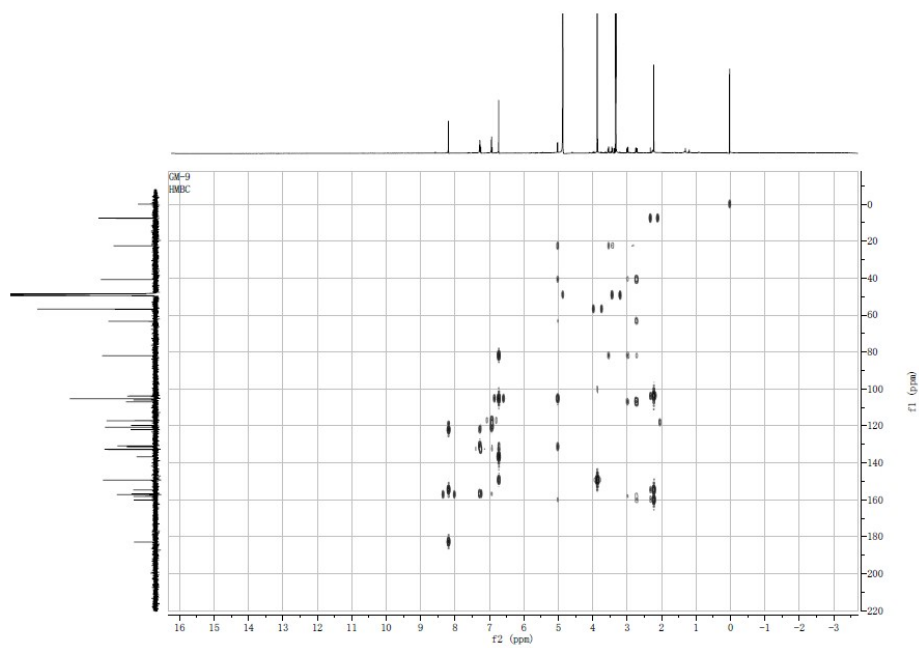

**Figure S17.** H-H COSY(600 MHz, MeOD) spectrum of **2**

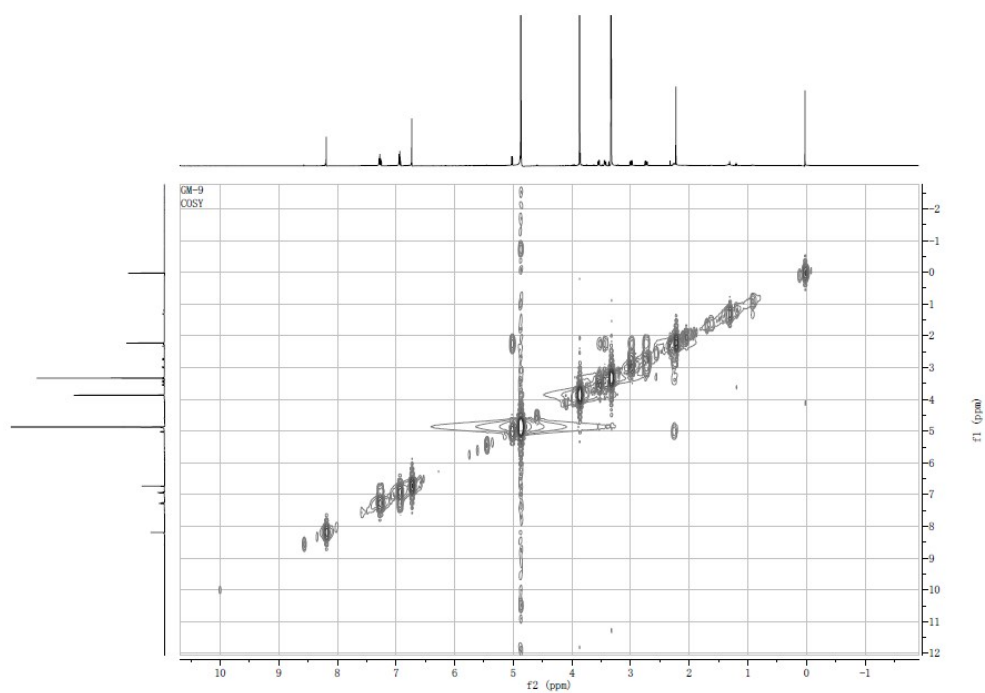

**Figure S18.** NOESY (600 MHz, MeOD) spectrum of **2**

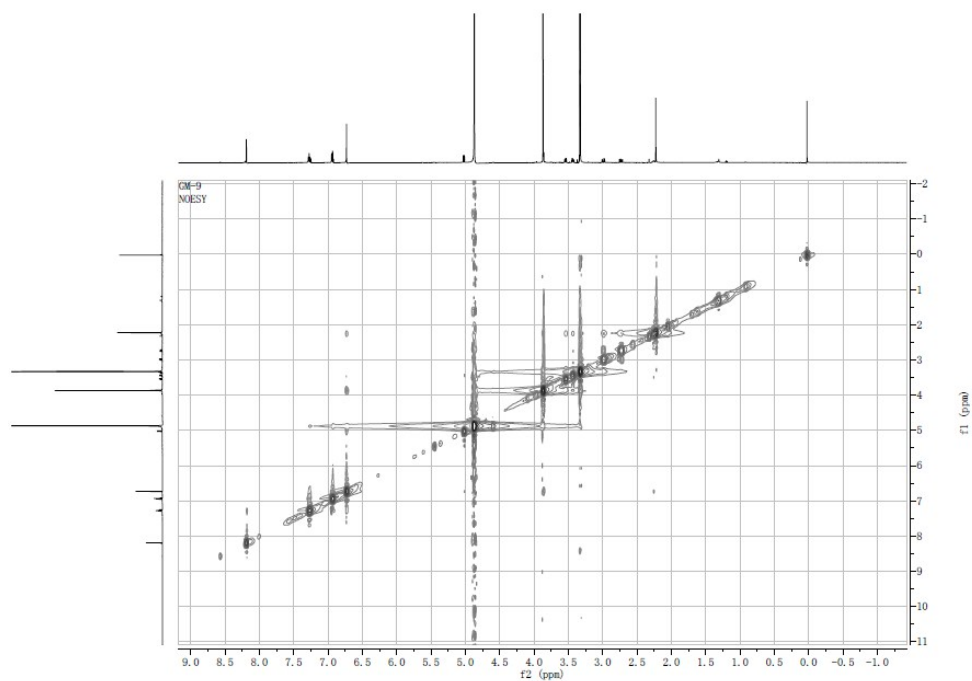

**Figure S19.** HRESIMS spectrum of **2**



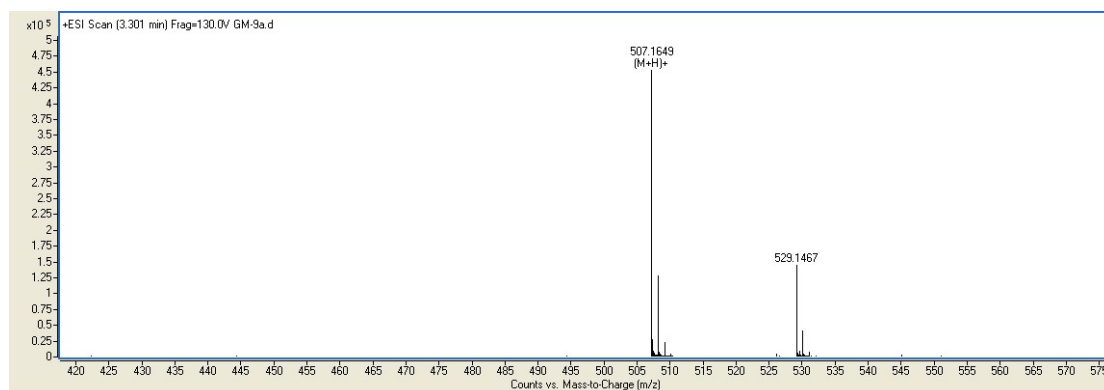

| No. | Formula                                        | Ion Formula                                    | Measured m/z | Calc m/z | ppm  |
|-----|------------------------------------------------|------------------------------------------------|--------------|----------|------|
| 2   | C <sub>28</sub> H <sub>26</sub> O <sub>9</sub> | C <sub>28</sub> H <sub>27</sub> O <sub>9</sub> | 507.1649     | 507.1650 | 0.20 |

**Figure S20.** Chiral-phase HPLC analytical chromatogram of **2**

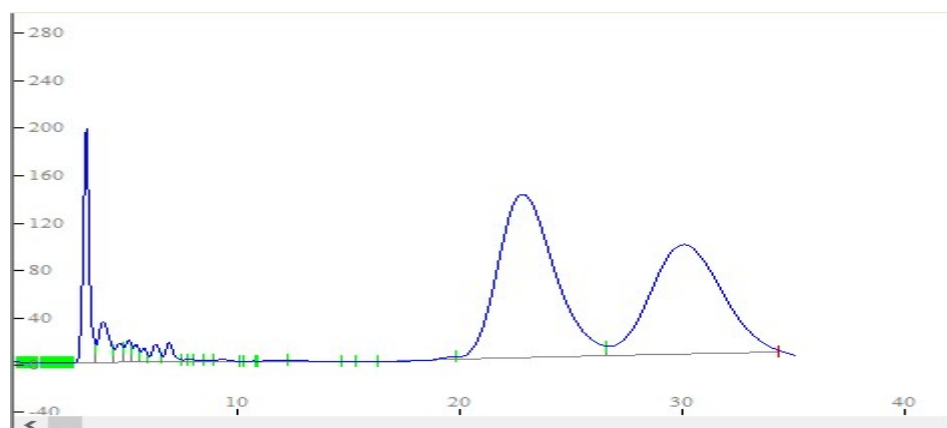

**Figure S21.** <sup>1</sup>H NMR (600 MHz, CDCl<sub>3</sub>) spectrum of **2a**

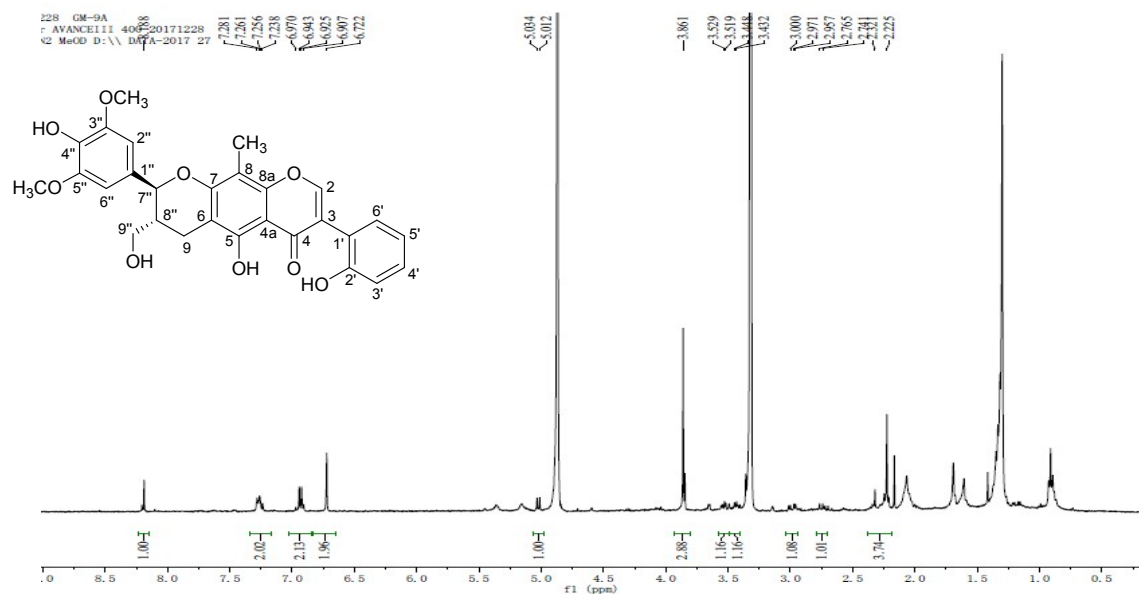

**Figure S22.**  $^1\text{H}$  NMR (600 MHz,  $\text{CDCl}_3$ ) spectrum of **2a**

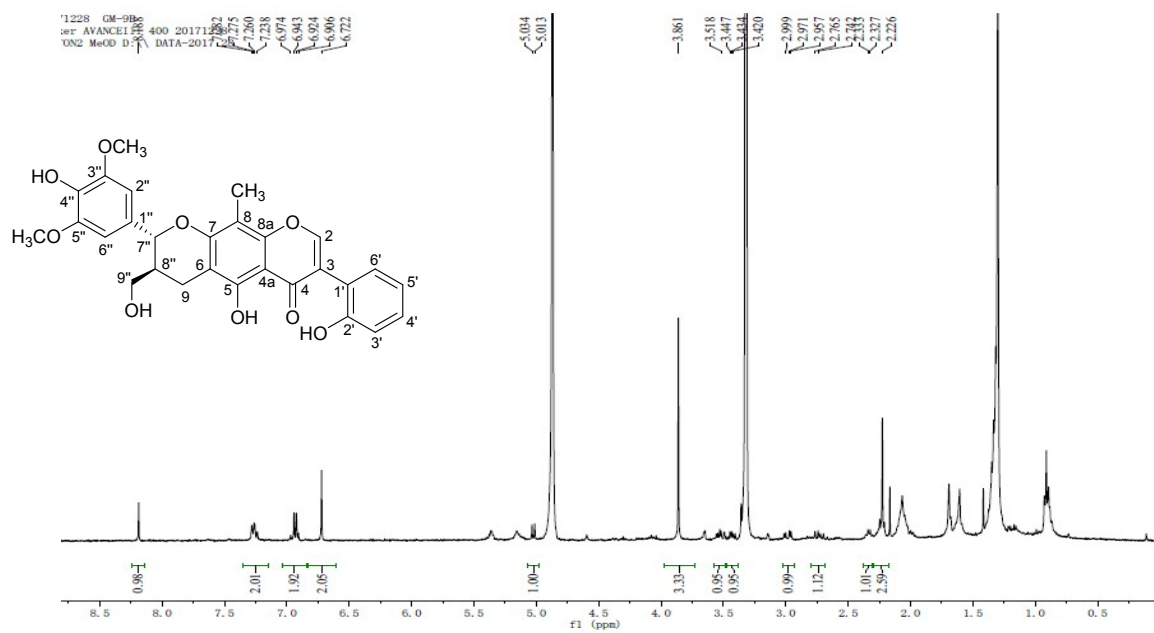

**Figure S23.** Experimental ECD spectra of **2a**

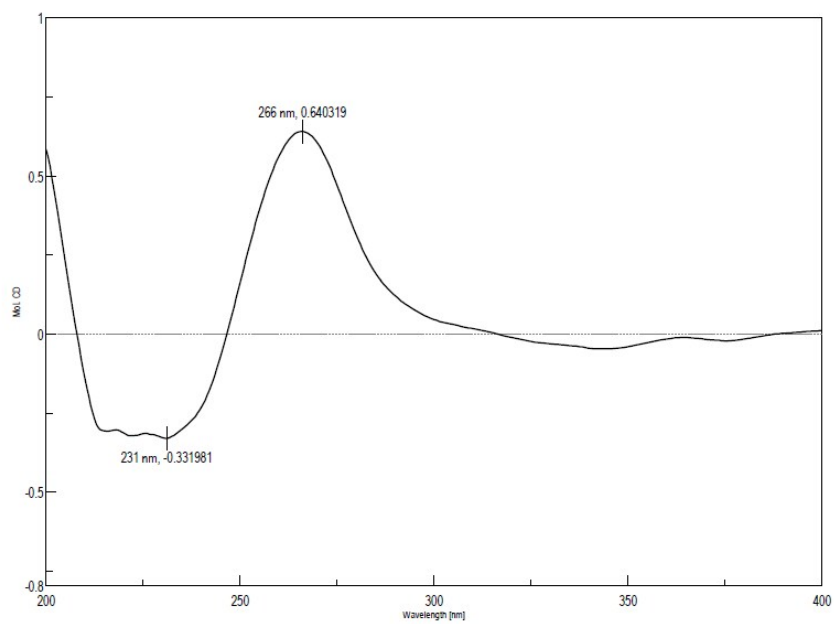

**Figure S24.** Experimental ECD spectra of **2b**

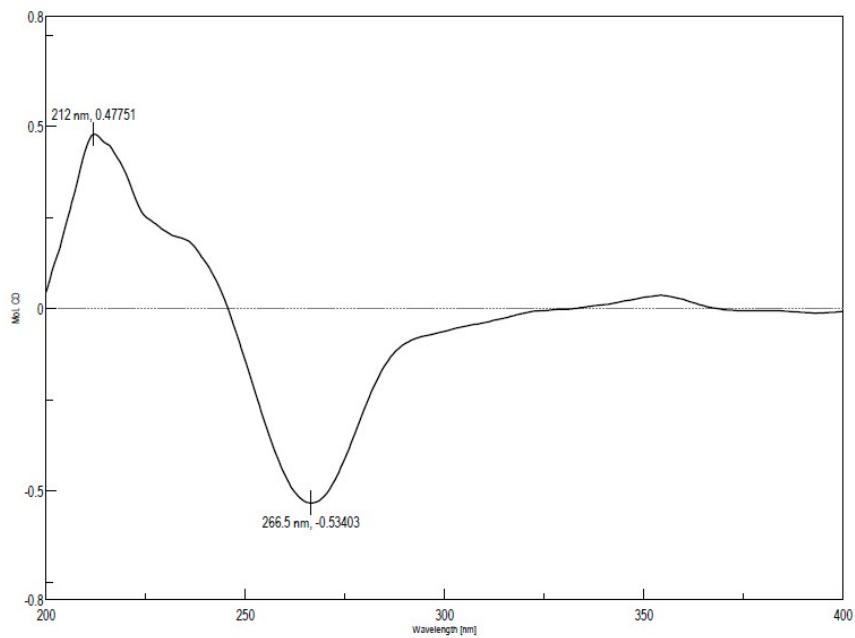

**Figure S25.**  $^1\text{H}$  NMR (600 MHz, MeOD) spectrum of **3**

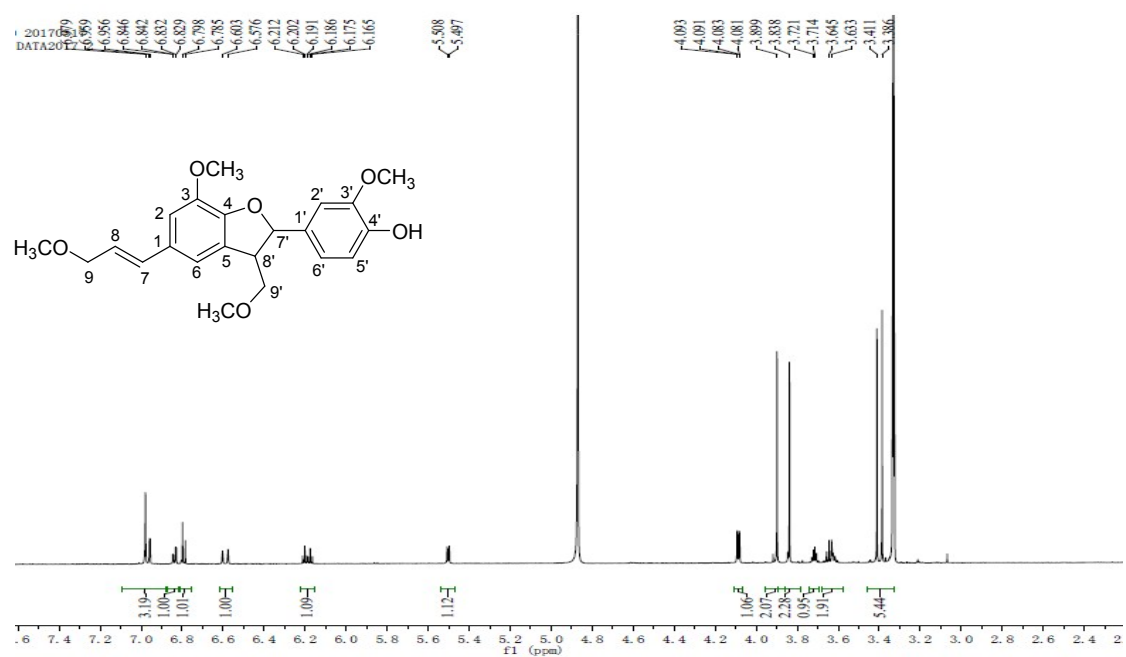

**Figure S26.** <sup>13</sup>C NMR (150 MHz, MeOD) spectrum of **3**

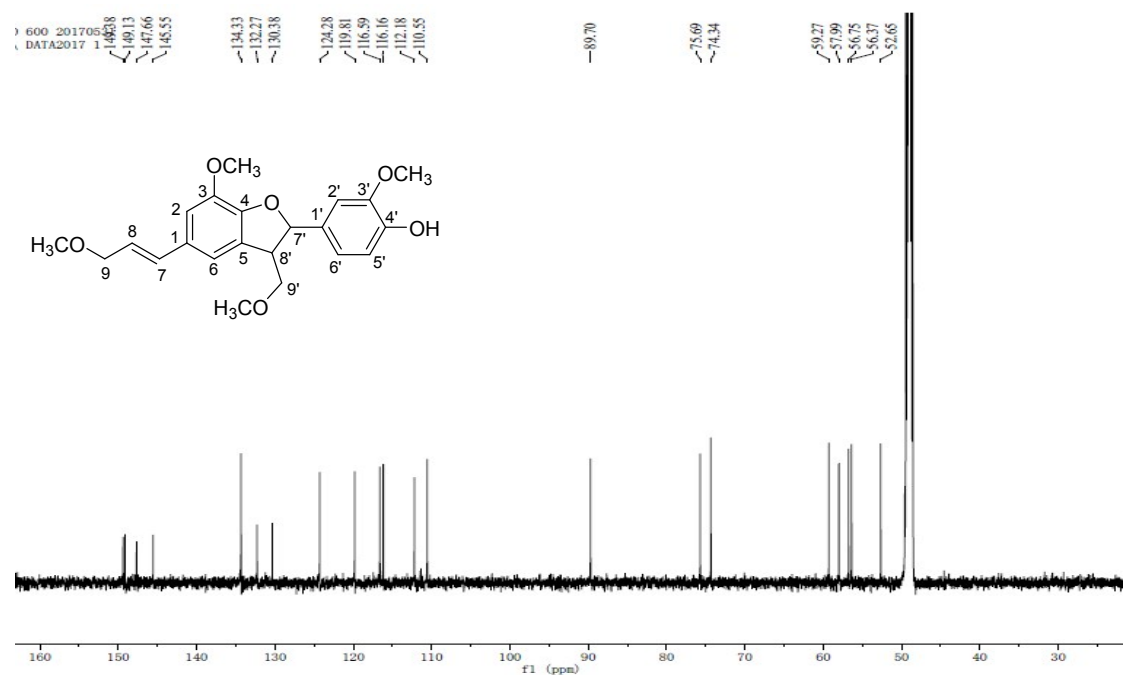

**Figure S27.** HSQC (600 MHz, MeOD) spectrum of **3**

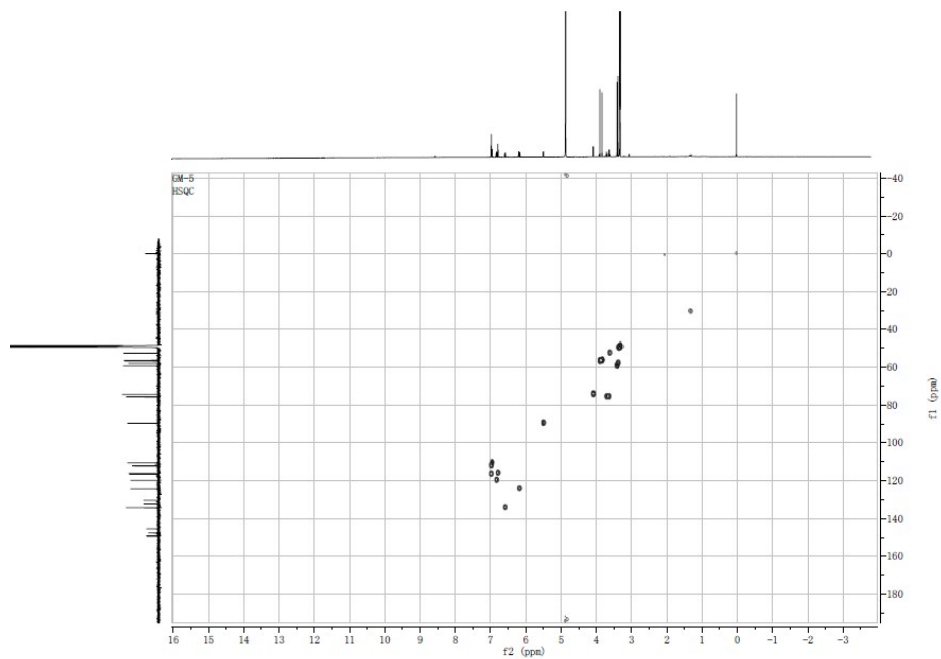

**Figure S28.** HMBC (600 MHz, MeOD) spectrum of **3**

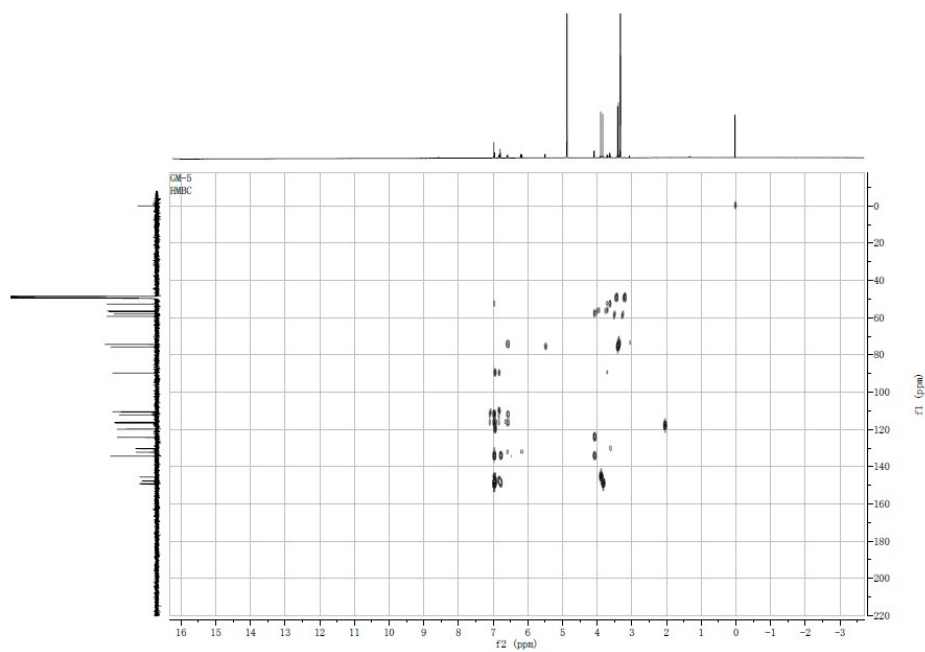

**Figure S29.** H-H COSY (600 MHz, MeOD) spectrum of **3**

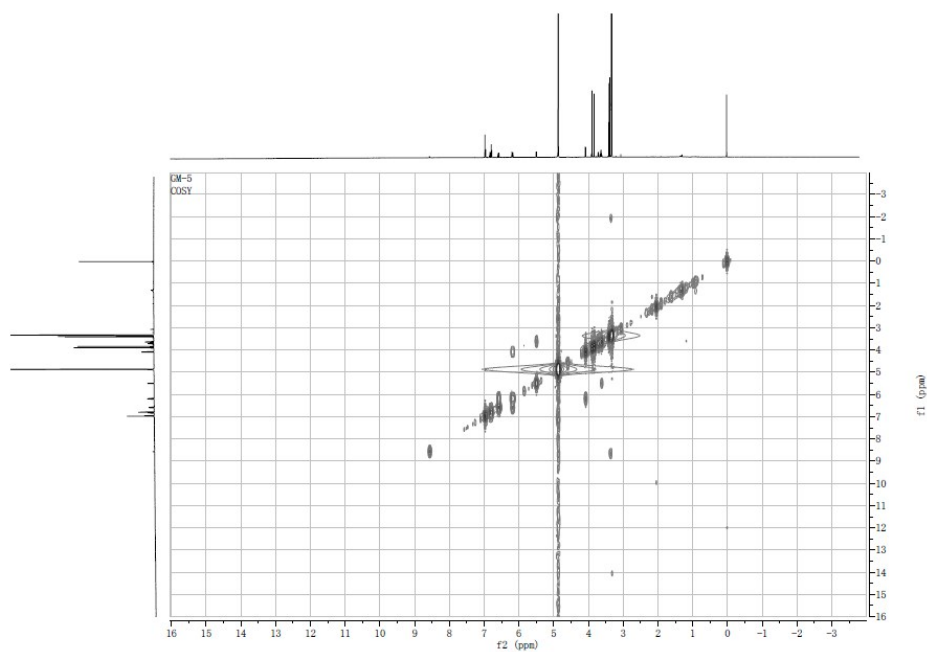

**Figure S30.** NOESY (600 MHz, MeOD) spectrum of **3**

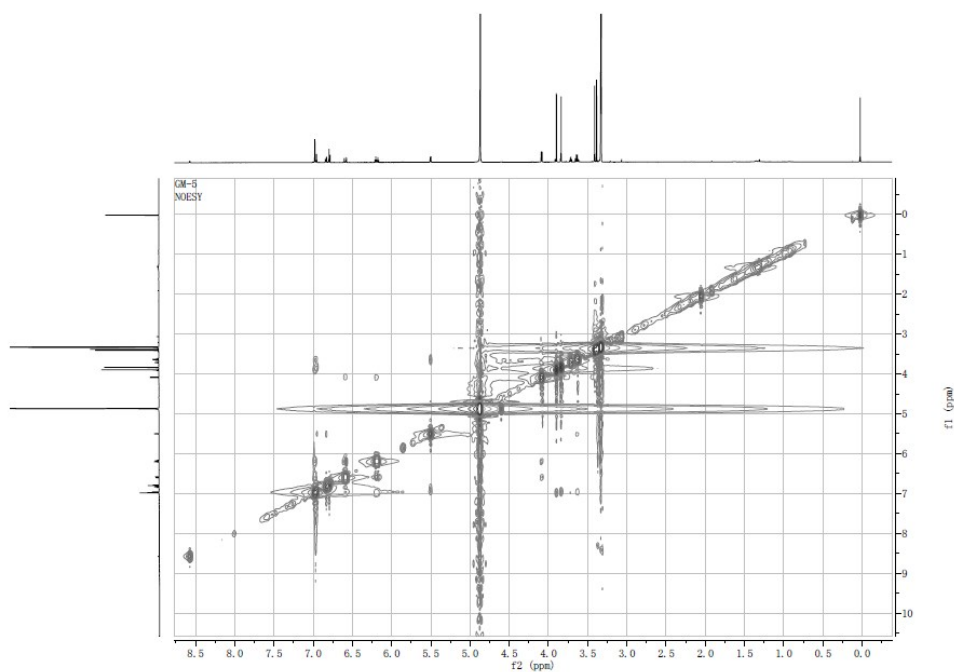

**Figure S31.** HRESIMS spectrum of **3**

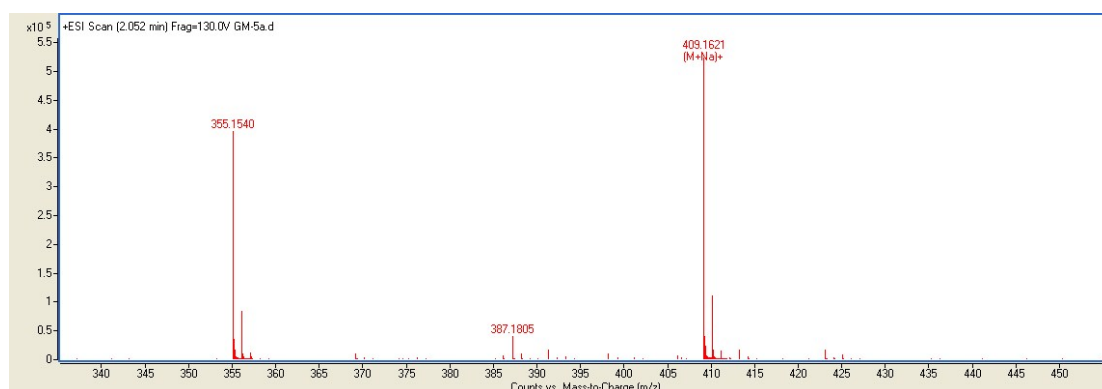

| No. | Formula                                        | Ion Formula                                      | Measured m/z | Calc m/z | ppm  |
|-----|------------------------------------------------|--------------------------------------------------|--------------|----------|------|
| 3   | C <sub>22</sub> H <sub>26</sub> O <sub>6</sub> | C <sub>22</sub> H <sub>26</sub> NaO <sub>6</sub> | 409.1621     | 409.1622 | 0.24 |

**Figure S32.** Chiral-phase HPLC analytical chromatogram of **3**

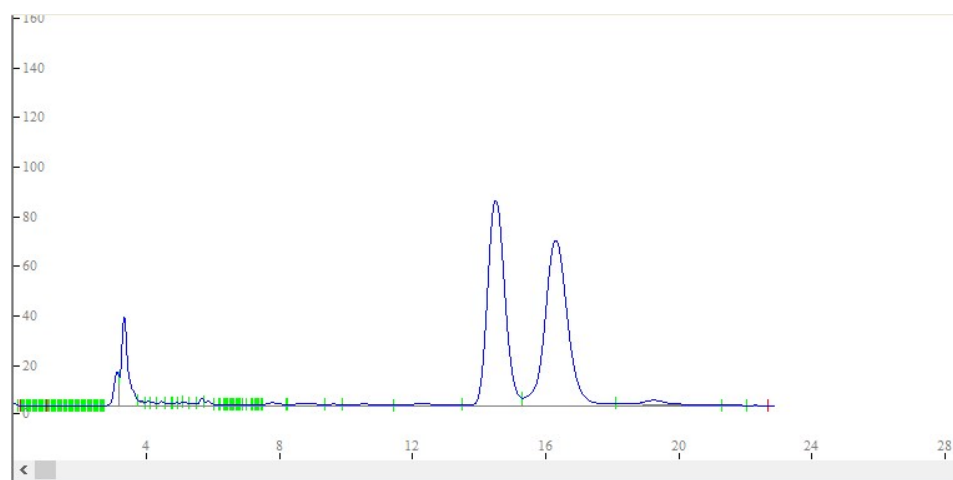

**Figure S33.** <sup>1</sup>H NMR (600 MHz, MeOD) spectrum of **3a**

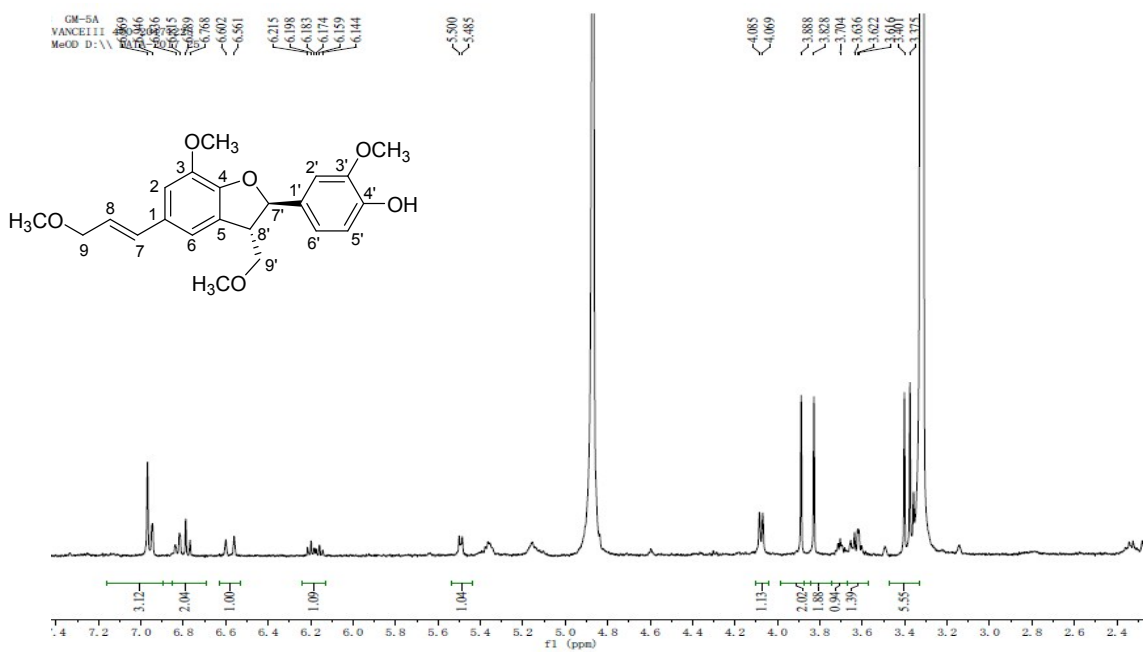

Figure S34.  $^1\text{H}$  NMR (600 MHz, MeOD) spectrum of **3b**

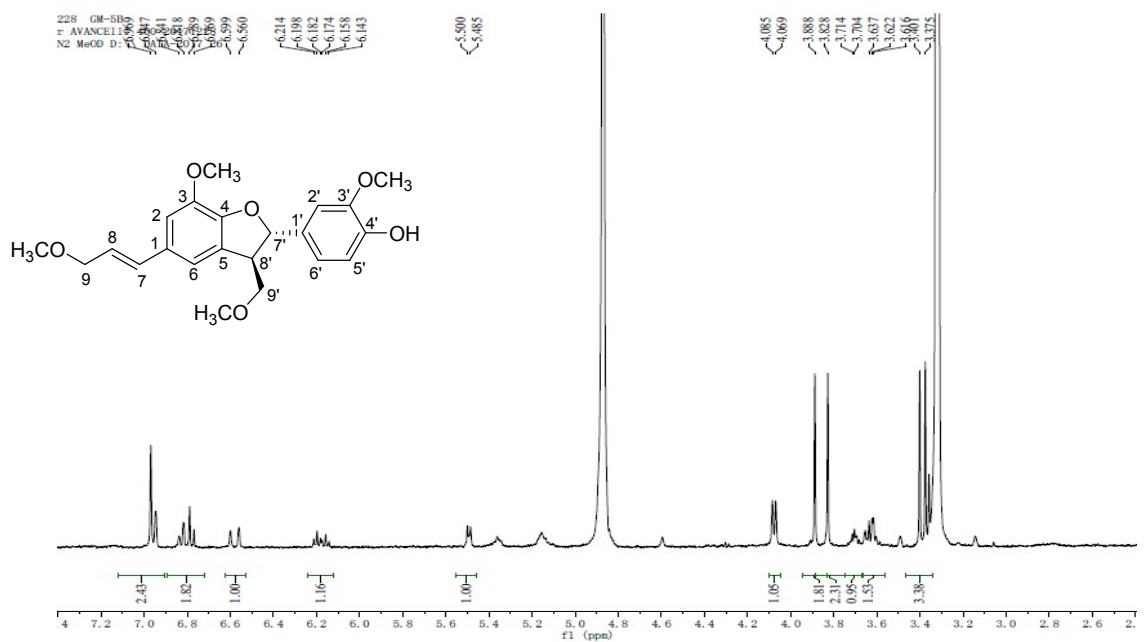

Figure S35. Experimental ECD spectra of **3a**



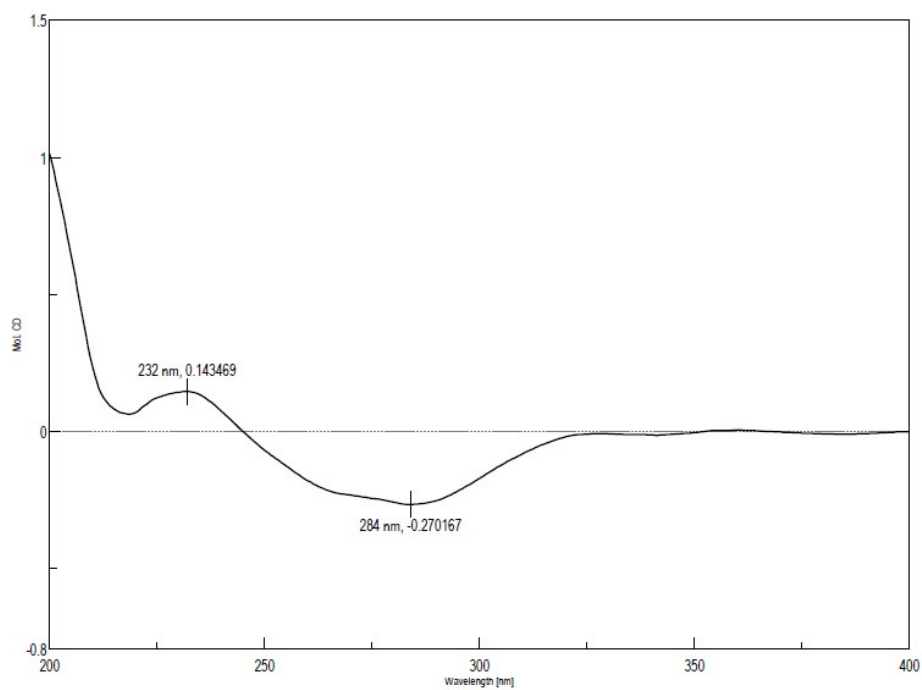

**Figure S36.** Experimental ECD spectra of **3b**

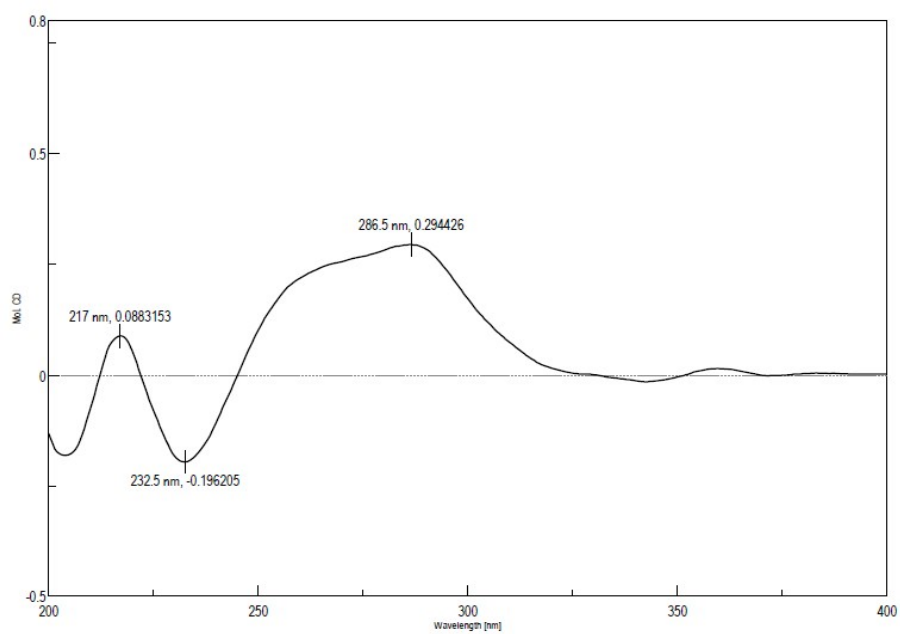

**Figure S37.** <sup>1</sup>H NMR (600 MHz, CDCl<sub>3</sub>) spectrum of **5**

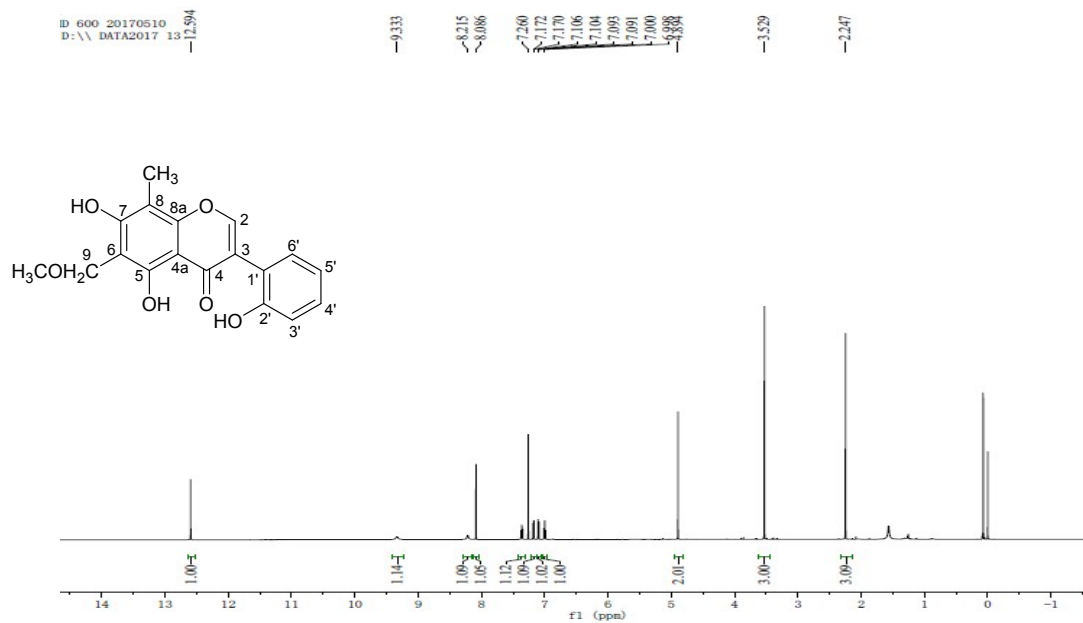

**Figure S38.**  $^{13}\text{C}$  NMR (150 MHz,  $\text{CDCl}_3$ ) spectrum of **5**

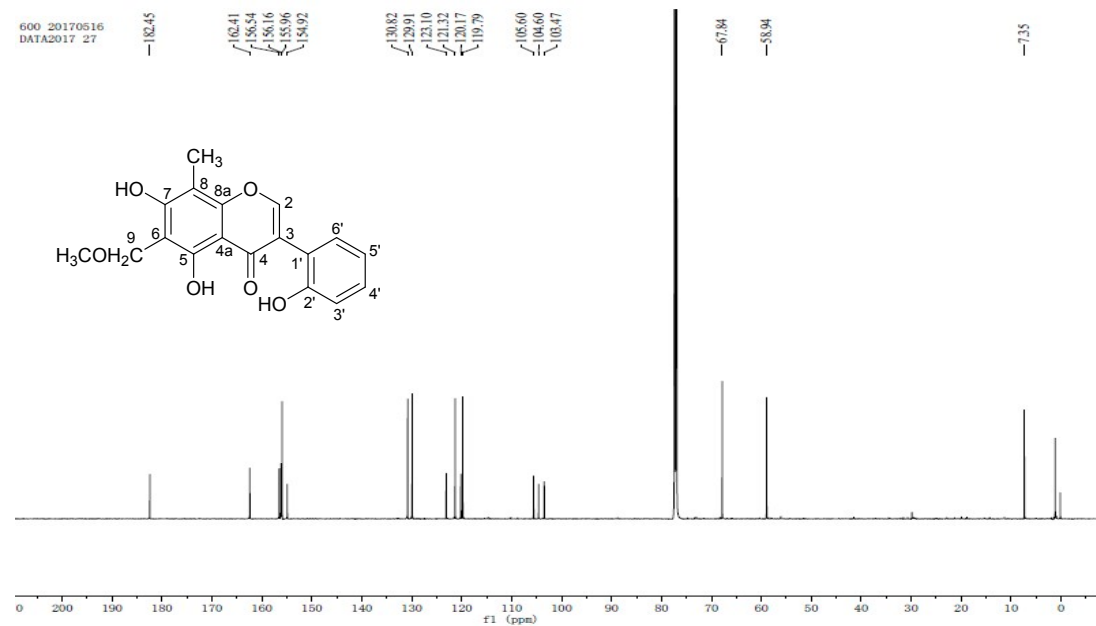

**Figure S39.** HSQC (600 MHz,  $\text{CDCl}_3$ ) spectrum of **5**

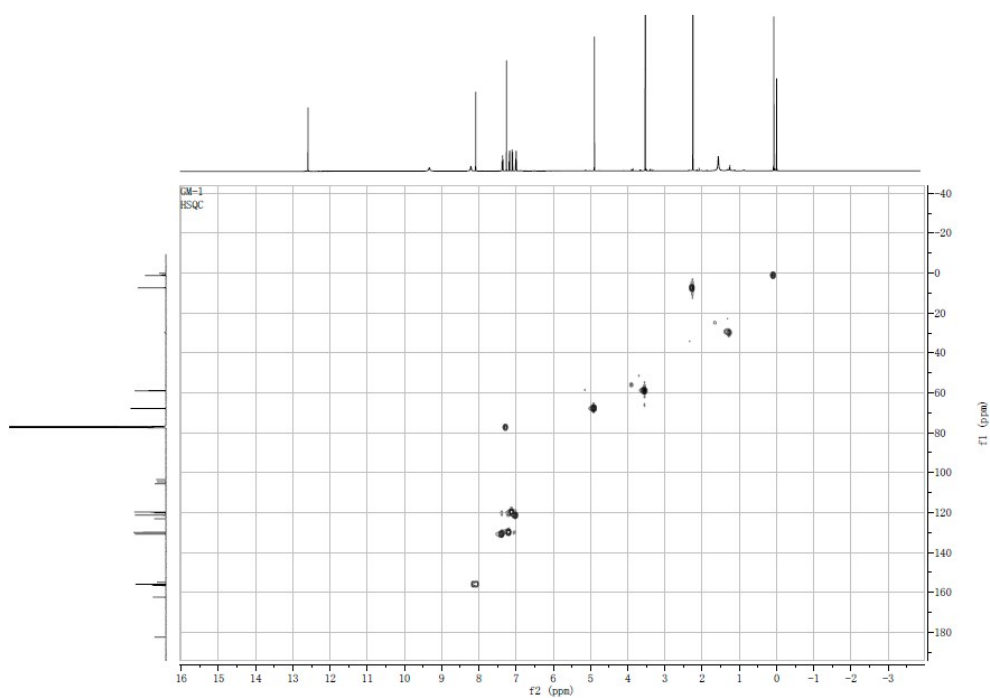

**Figure S40.** HMBC (600 MHz, CDCl<sub>3</sub>) spectrum of **5**

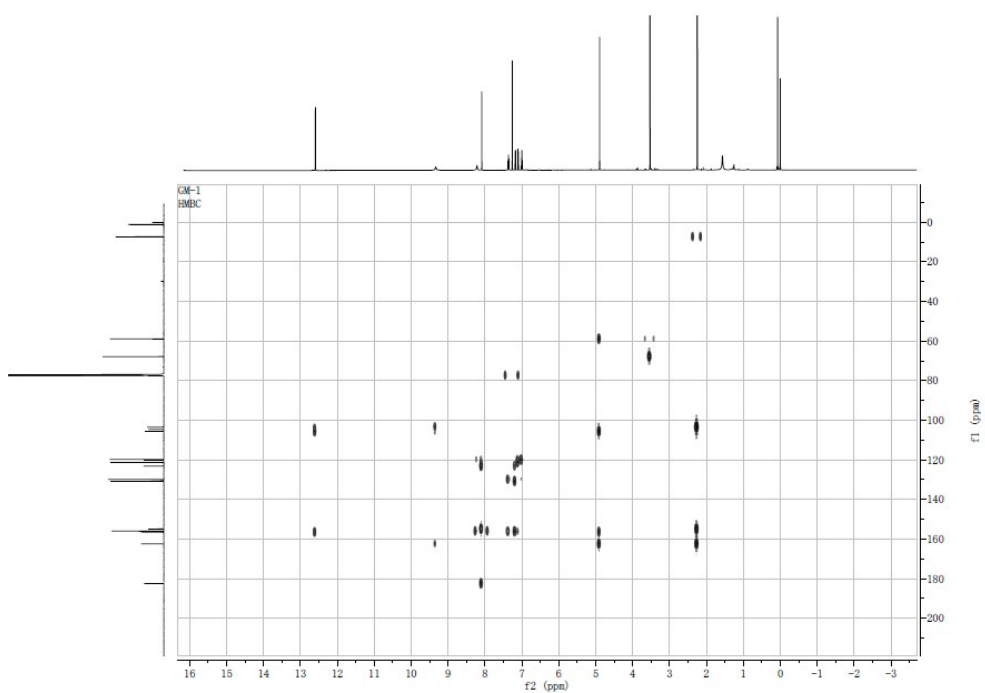

**Figure S41.** H-H COSY (600 MHz, CDCl<sub>3</sub>) spectrum of **5**

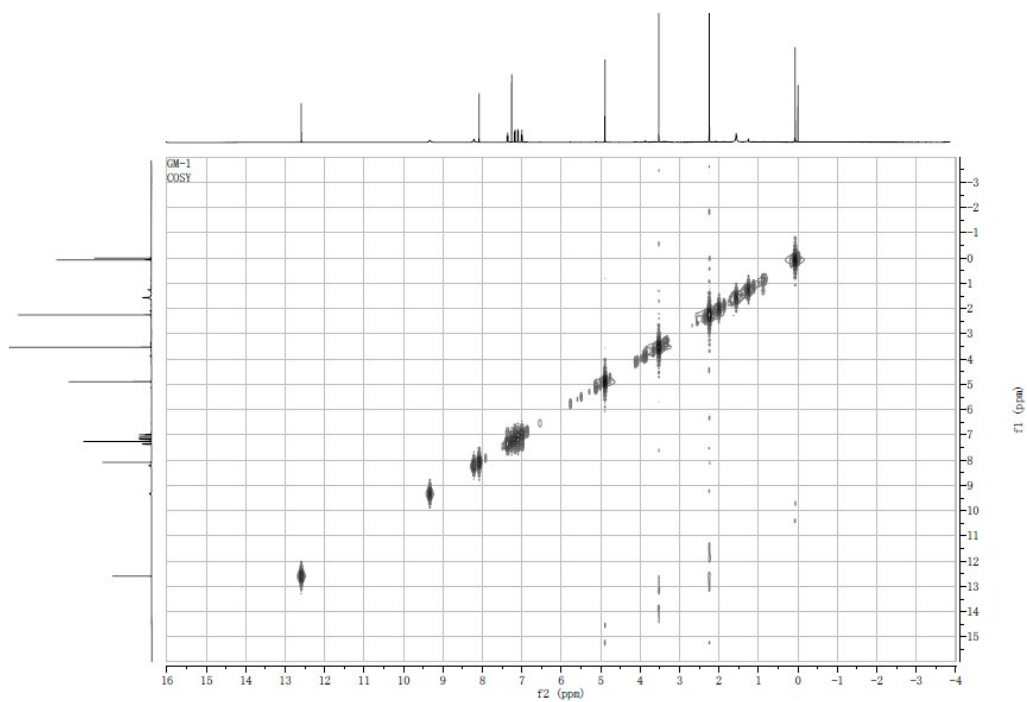

**Figure S42.** NOESY (600 MHz, CDCl<sub>3</sub>) spectrum of **5**

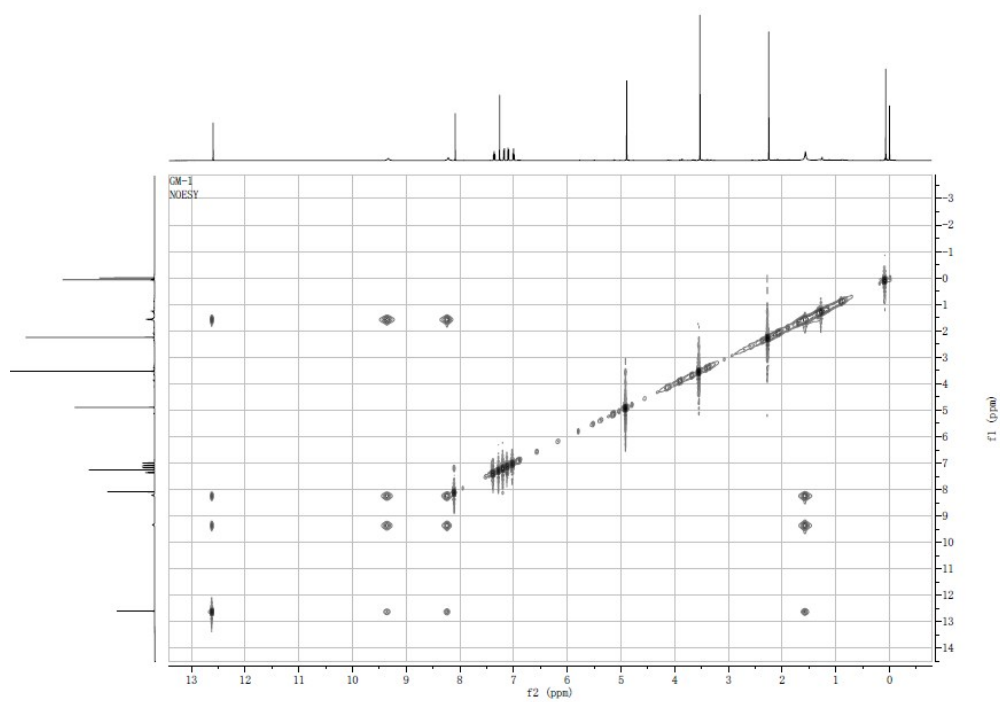

**Figure S43.** HRESIMS spectrum of **5**

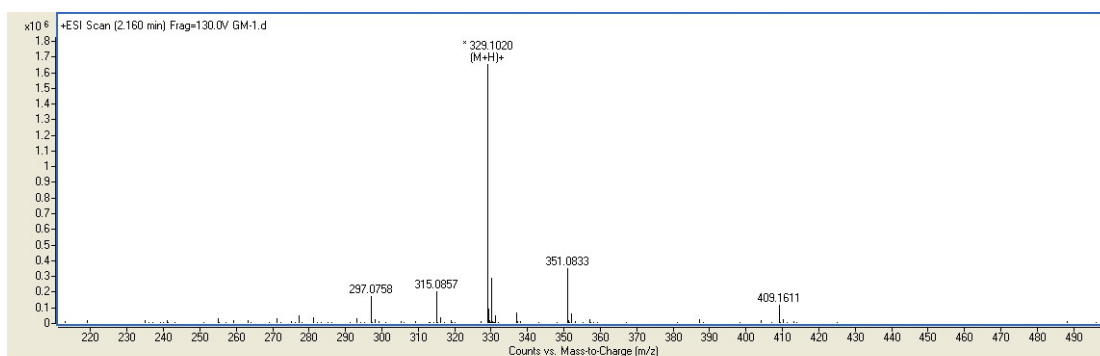

| No. | Formula                                        | Ion Formula                                    | Measured m/z | Calc m/z | ppm |
|-----|------------------------------------------------|------------------------------------------------|--------------|----------|-----|
| 5   | C <sub>18</sub> H <sub>16</sub> O <sub>6</sub> | C <sub>18</sub> H <sub>17</sub> O <sub>6</sub> | 329.1020     | 329.1020 | 0   |

**Figure S44.** <sup>1</sup>H NMR (600 MHz, CDCl<sub>3</sub>) spectrum of **6**

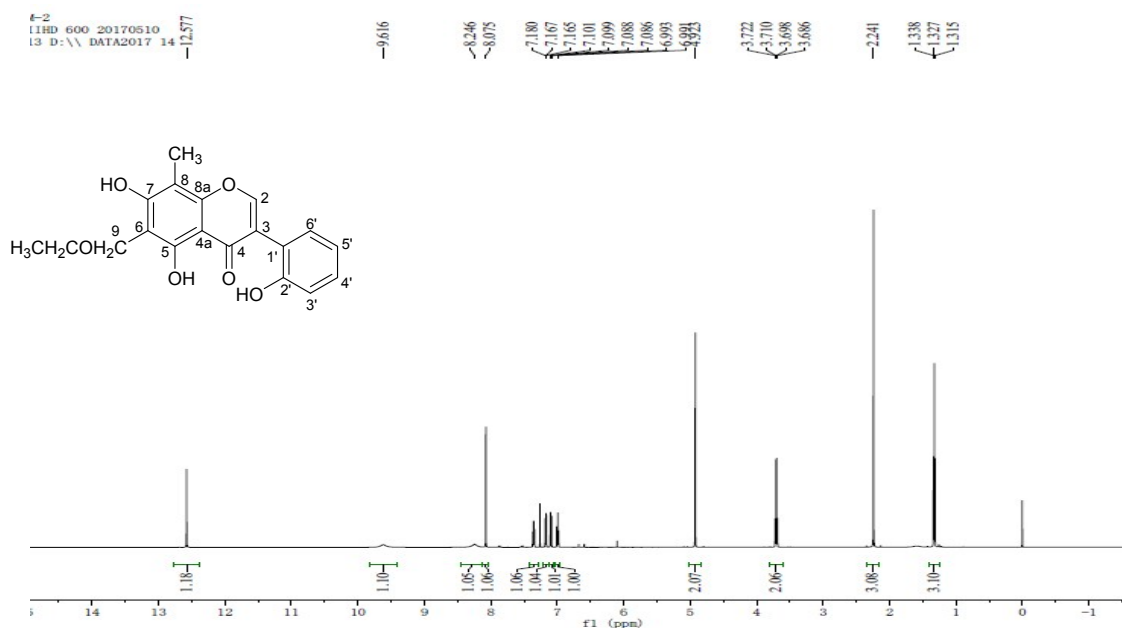

**Figure S45.** <sup>13</sup>C NMR (150 MHz, CDCl<sub>3</sub>) spectrum of **6**

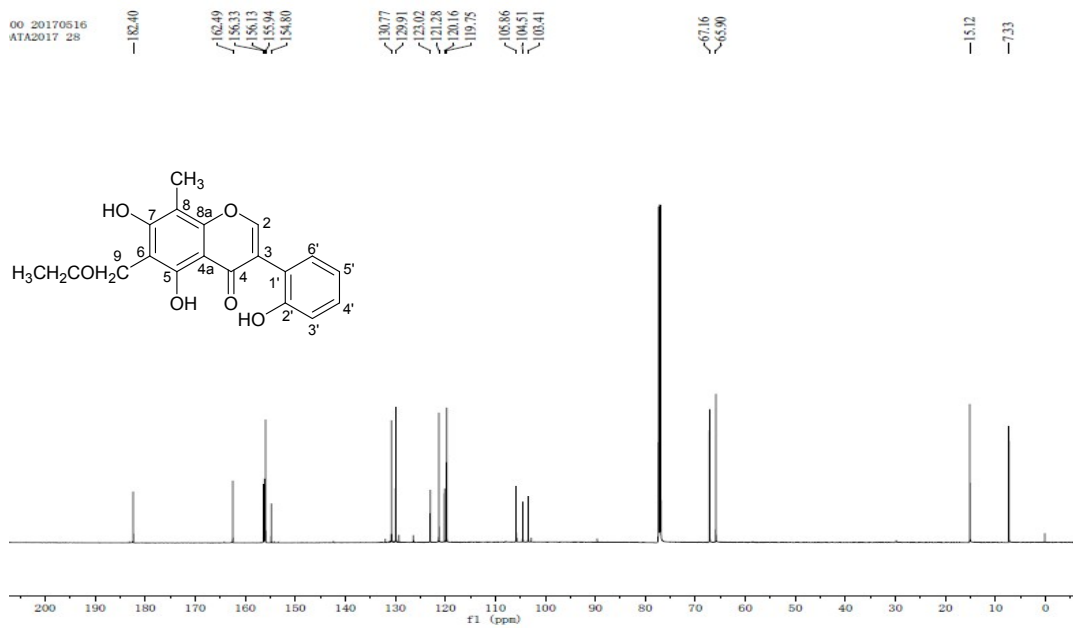

**Figure S46.** HSQC (600 MHz, CDCl<sub>3</sub>) spectrum of **6**

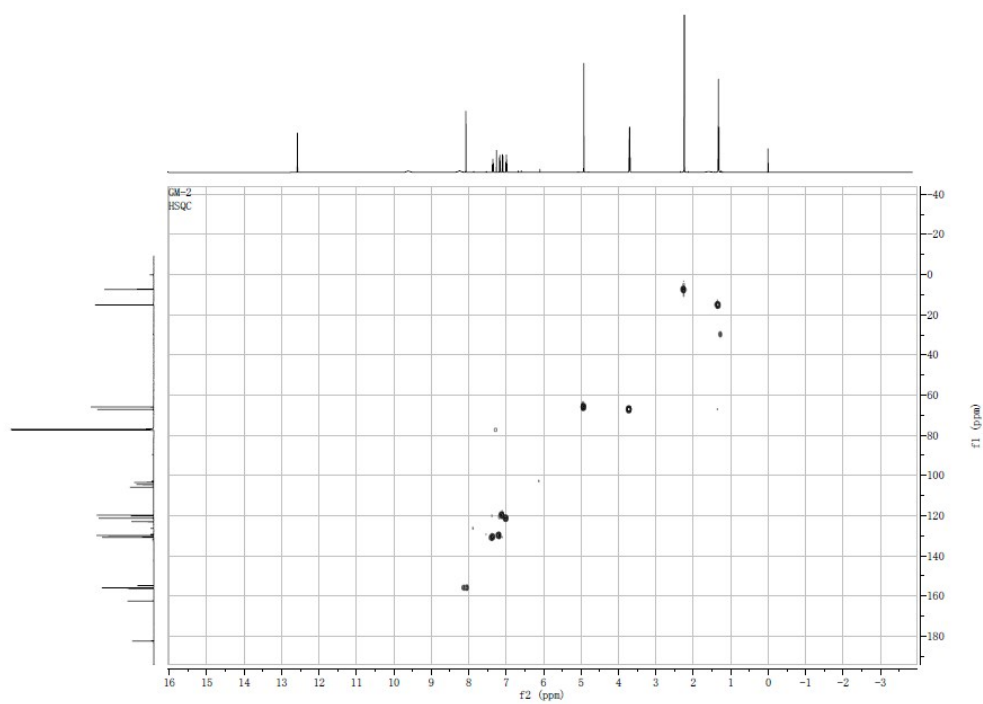

**Figure S47.** HMBC (600 MHz, CDCl<sub>3</sub>) spectrum of **6**

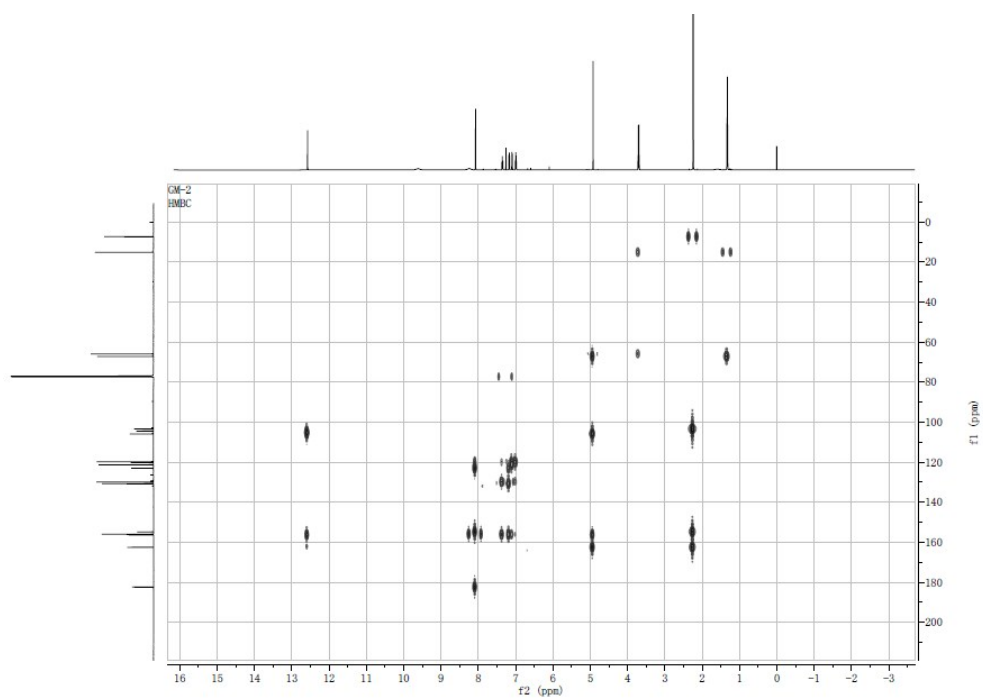

**Figure S48.** H-H COSY (600 MHz, CDCl<sub>3</sub>) spectrum of **6**

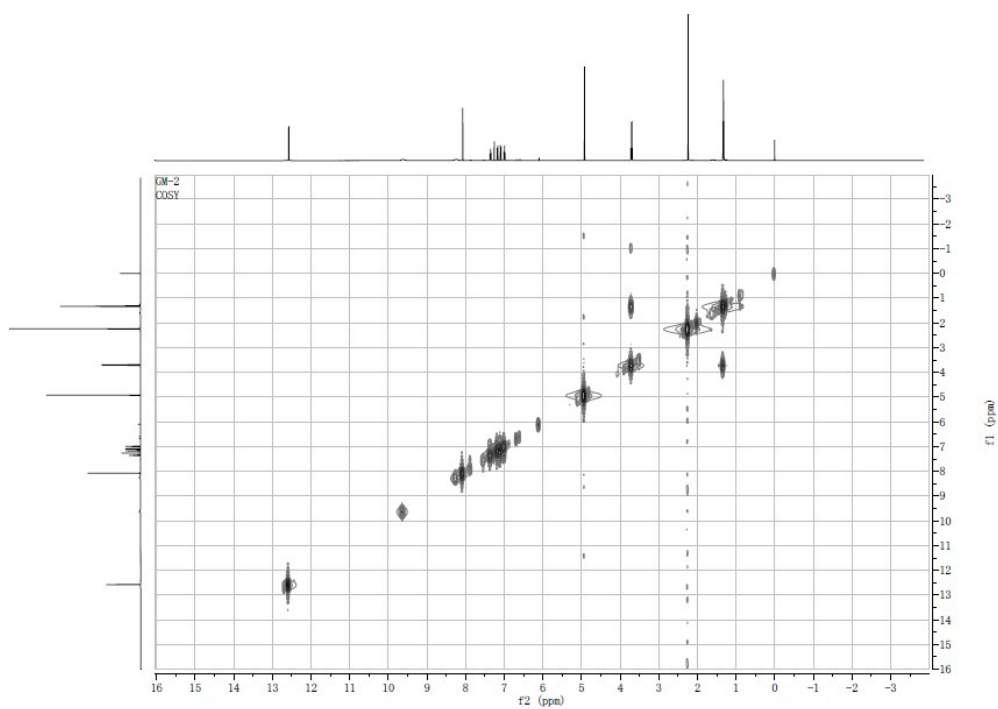

**Figure S49.** NOESY (600 MHz, CDCl<sub>3</sub>) spectrum of **6**

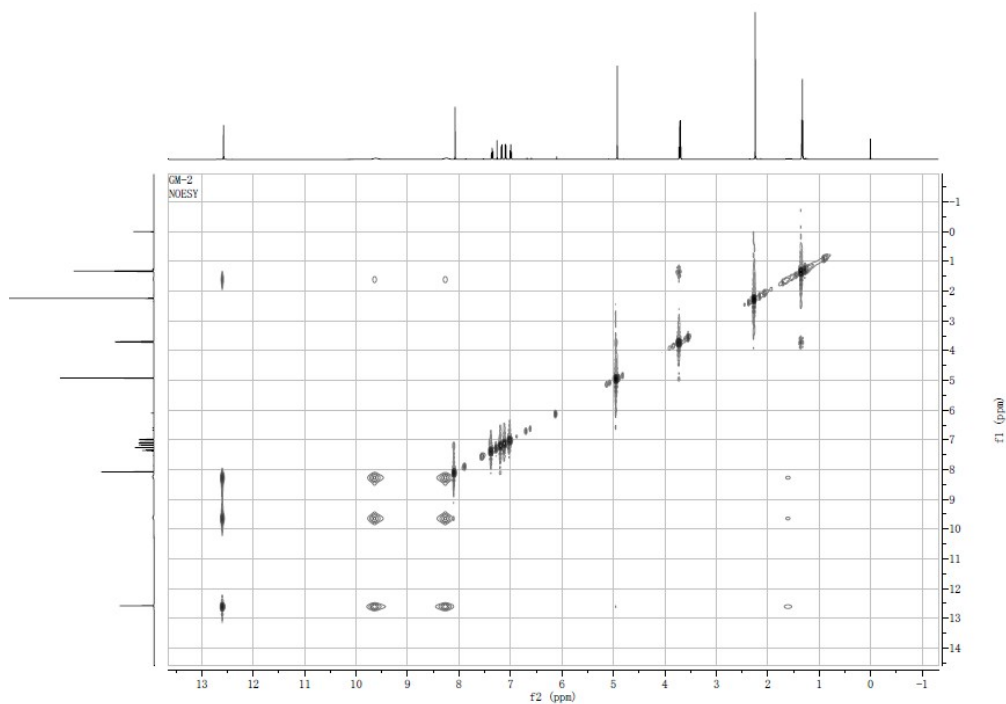

**Figure S50.** HRESIMS spectrum of **6**

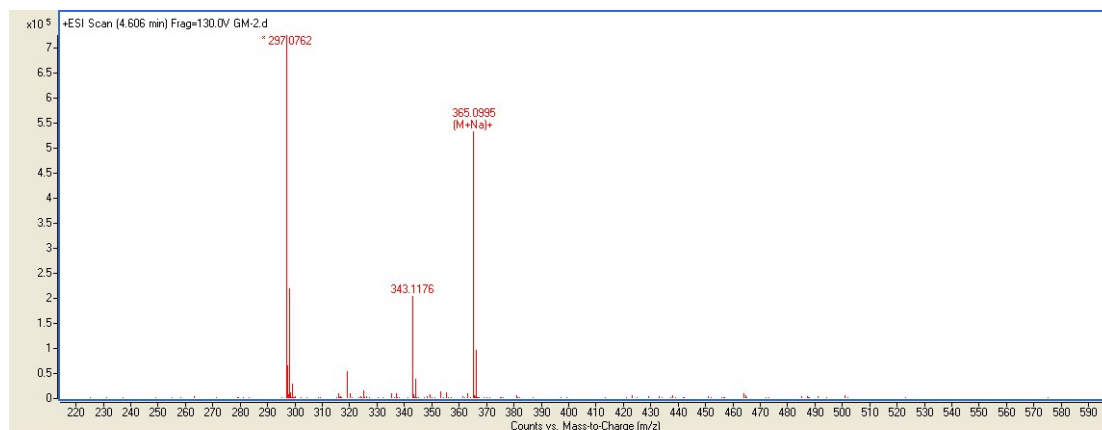

| No.      | Formula           | Ion Formula         | Measured m/z | Calc m/z | ppm  |
|----------|-------------------|---------------------|--------------|----------|------|
| <b>6</b> | $C_{19}H_{18}O_6$ | $C_{19}H_{18}NaO_6$ | 365.0995     | 365.0996 | 0.27 |



Figure S51.  $^1\text{H}$  NMR (600 MHz,  $\text{CDCl}_3$ ) spectrum of **7**

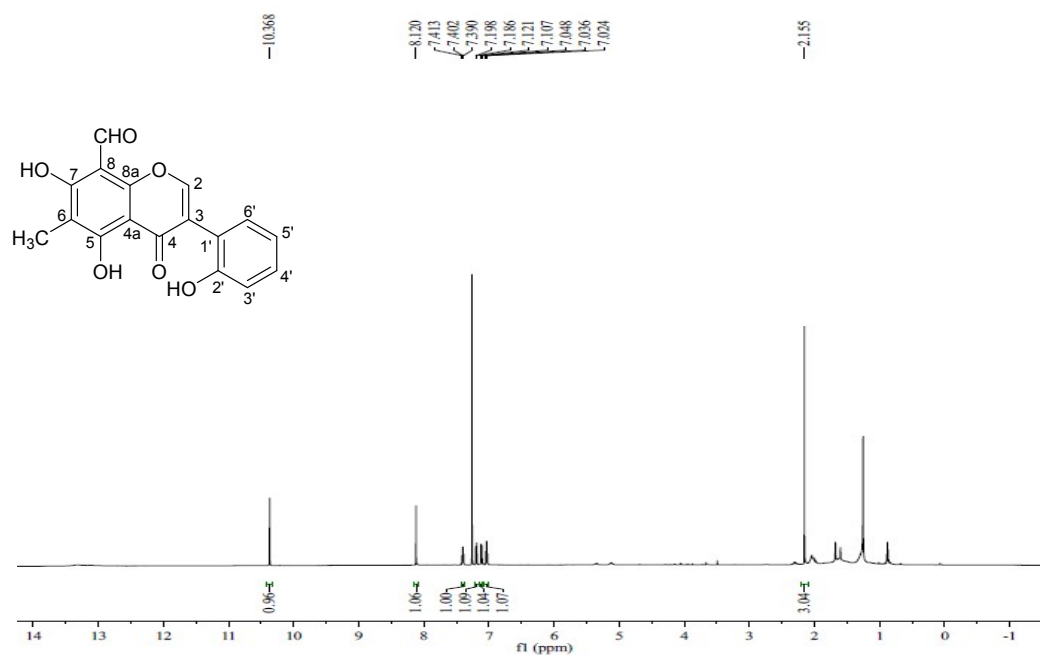

Figure S52.  $^{13}\text{C}$  NMR (150 MHz,  $\text{CDCl}_3$ ) spectrum of **7**

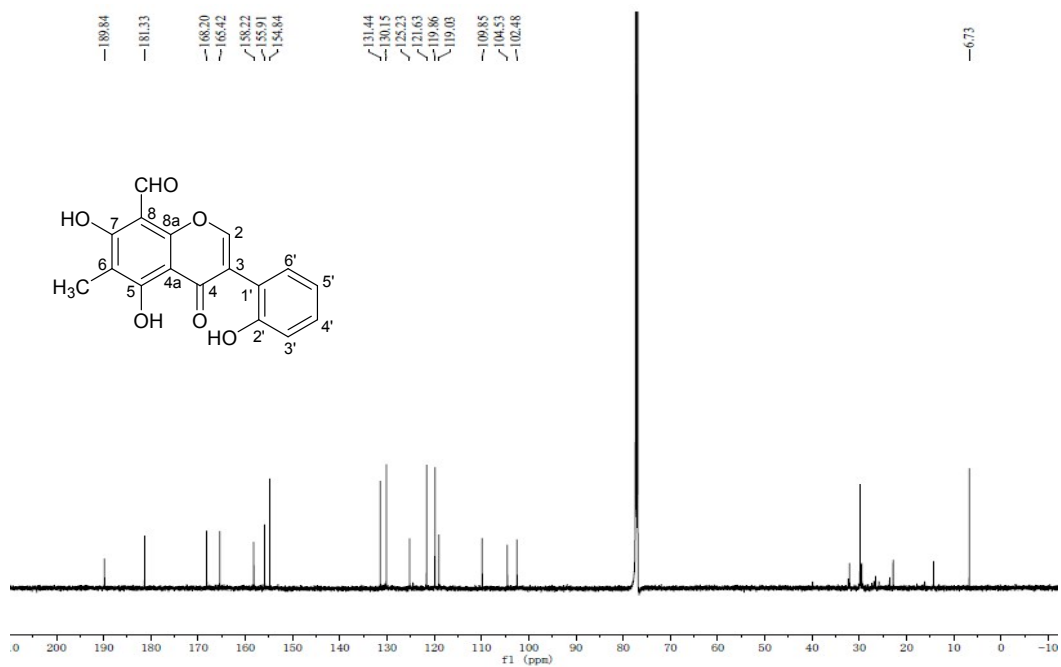

**Figure S53.** HSQC (600 MHz, CDCl<sub>3</sub>) spectrum of **7**

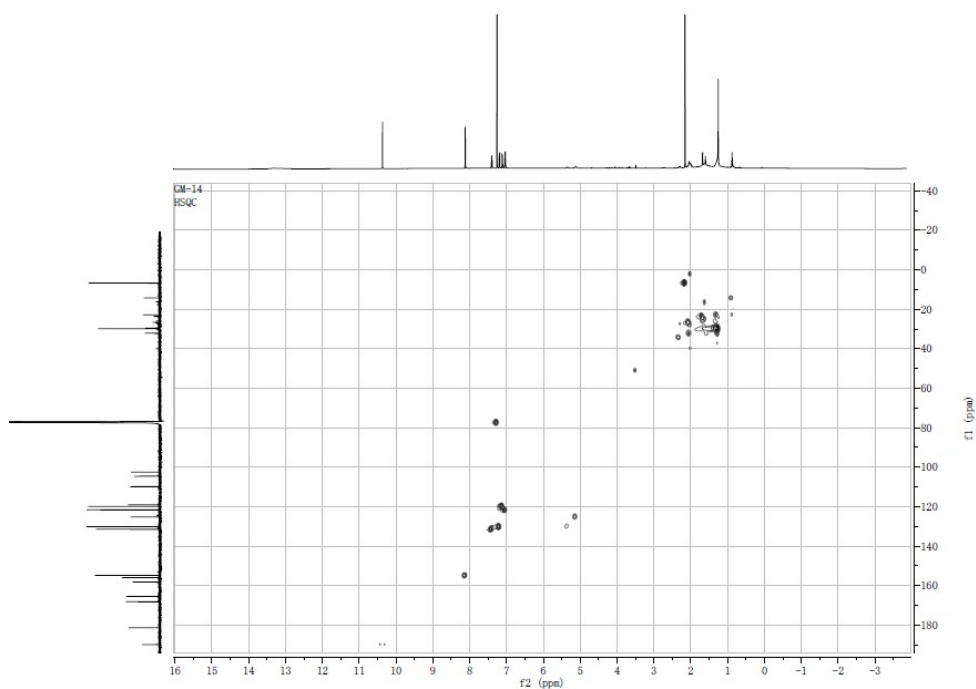

**Figure S54.** HMBC (600 MHz, CDCl<sub>3</sub>) spectrum of **7**

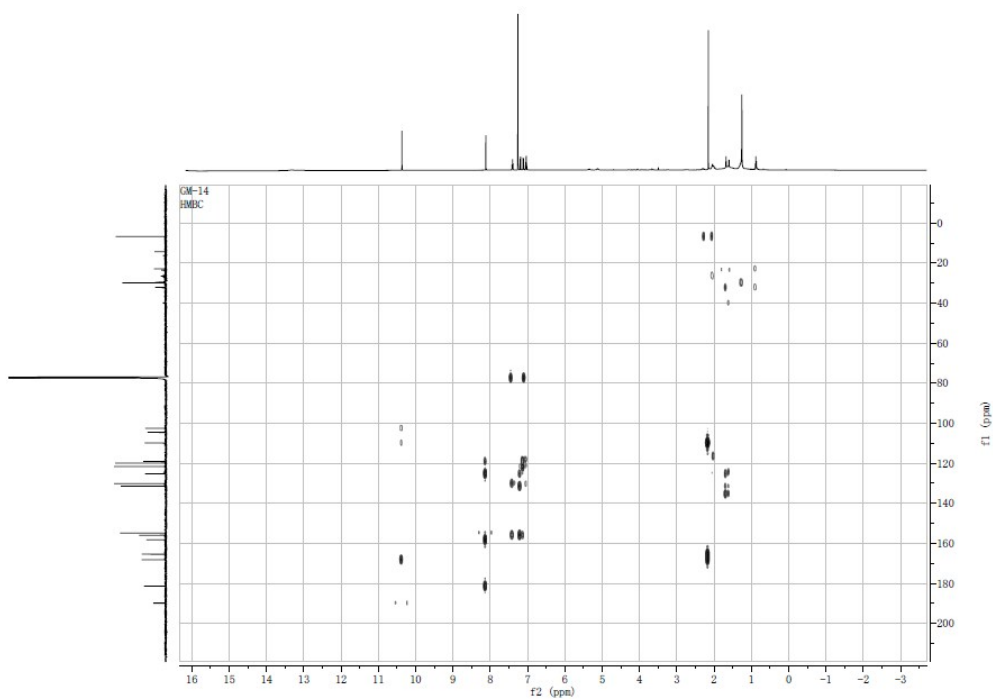

**Figure S55.** H-H COSY (600 MHz, CDCl<sub>3</sub>) spectrum of **7**

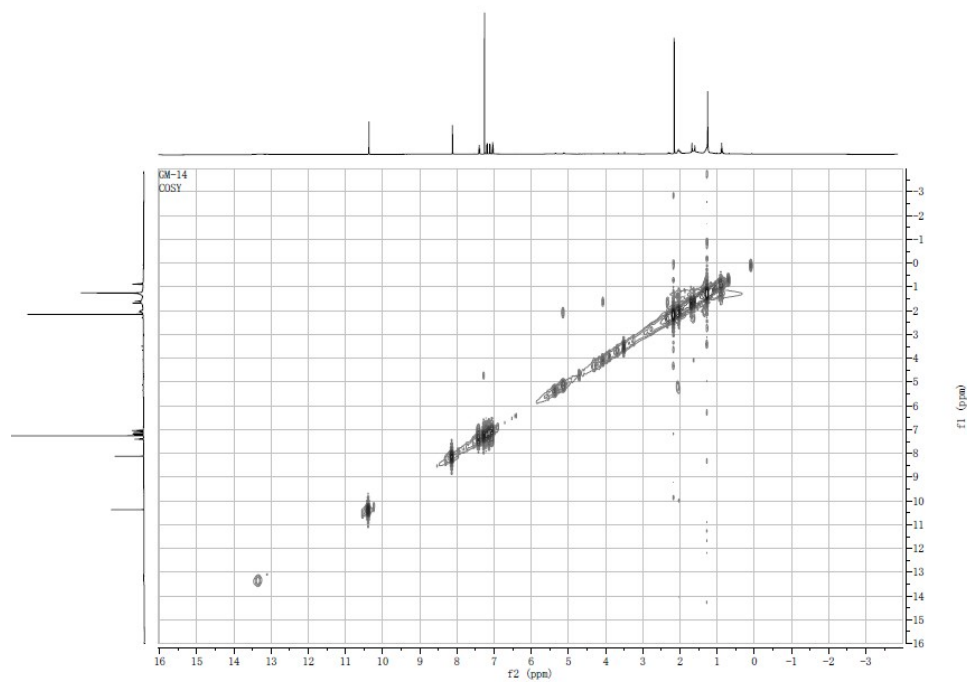

**Figure S56.** NOESY (600 MHz, CDCl<sub>3</sub>) spectrum of **7**

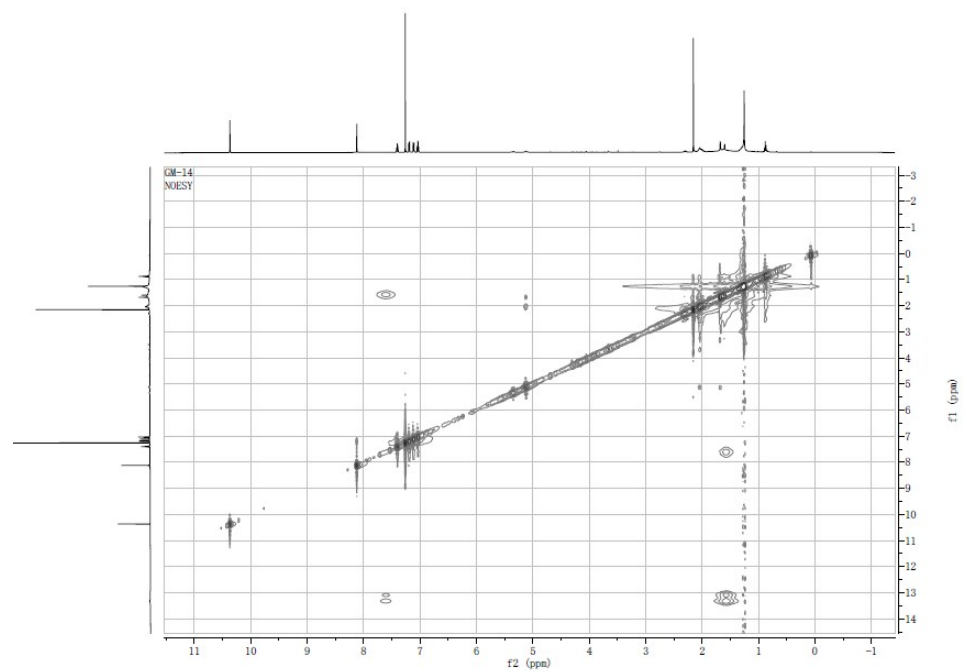

**Figure S57.** HRESIMS spectrum of **7**

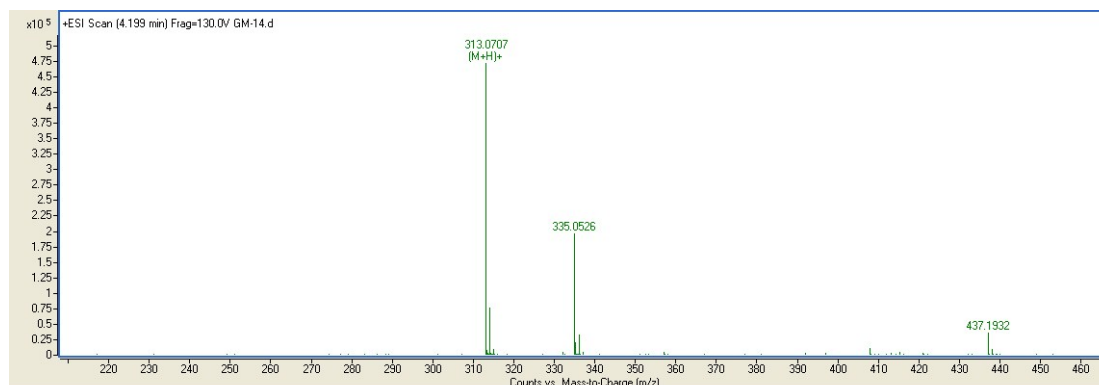

| No. | Formula                                        | Ion Formula                                    | Measured m/z | Calc m/z | ppm |
|-----|------------------------------------------------|------------------------------------------------|--------------|----------|-----|
| 7   | C <sub>17</sub> H <sub>12</sub> O <sub>6</sub> | C <sub>17</sub> H <sub>13</sub> O <sub>6</sub> | 313.0707     | 313.0707 | 0   |

**Figure S58.** <sup>1</sup>H NMR (600 MHz, CDCl<sub>3</sub>) spectrum of **8**

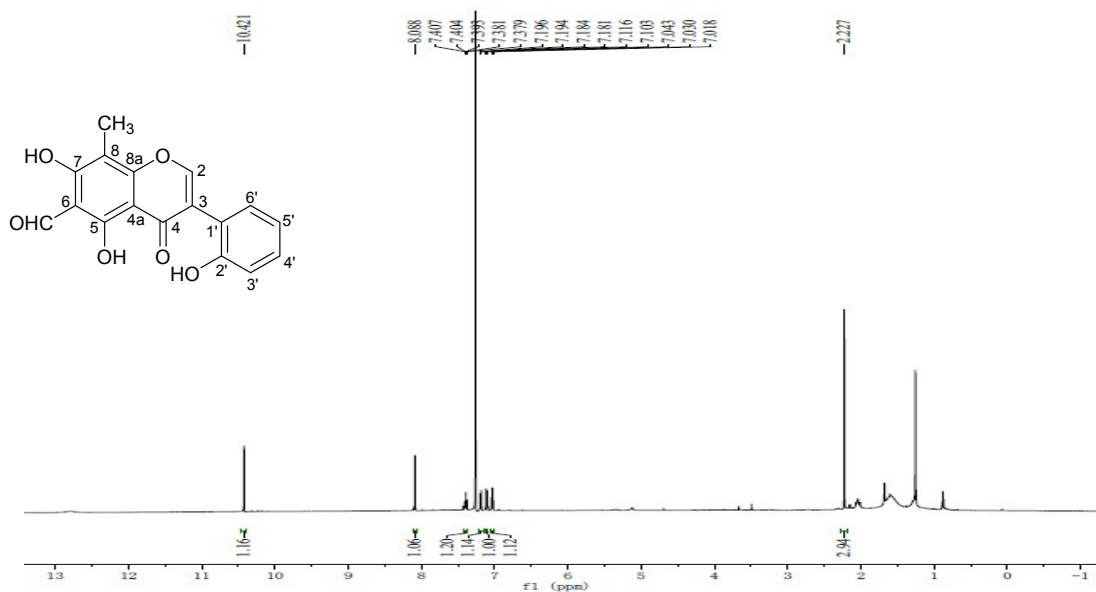

**Figure S59.**  $^{13}\text{C}$  NMR (150 MHz,  $\text{CDCl}_3$ ) spectrum of **8**

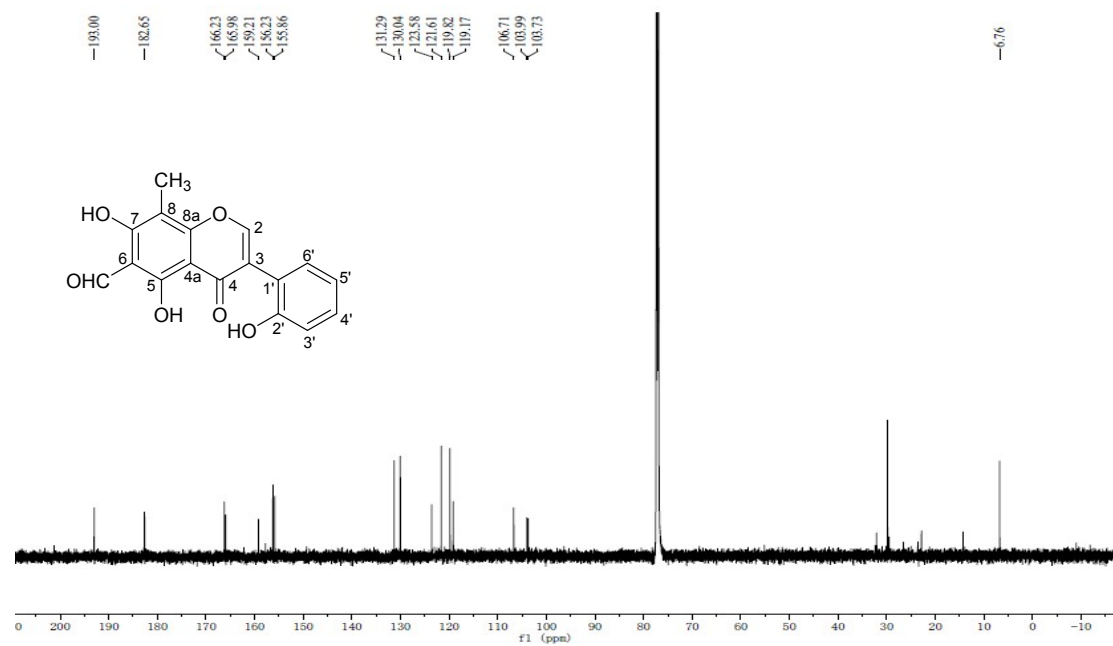

**Figure S60.** HSQC (600 MHz,  $\text{CDCl}_3$ ) spectrum of **8**

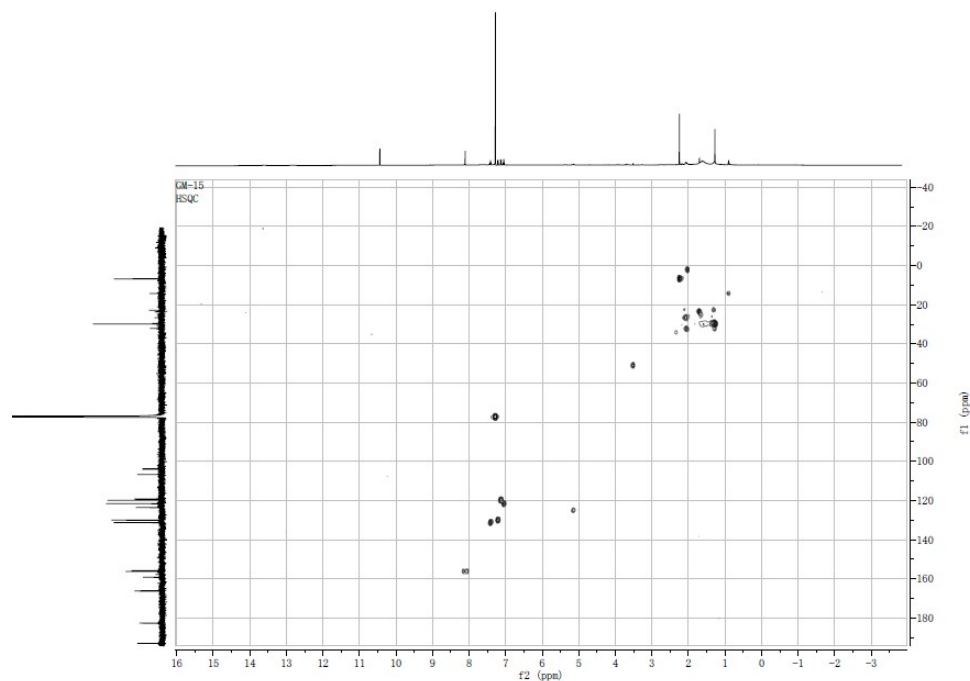

**Figure S61.** HMBC (600 MHz, CDCl<sub>3</sub>) spectrum of **8**

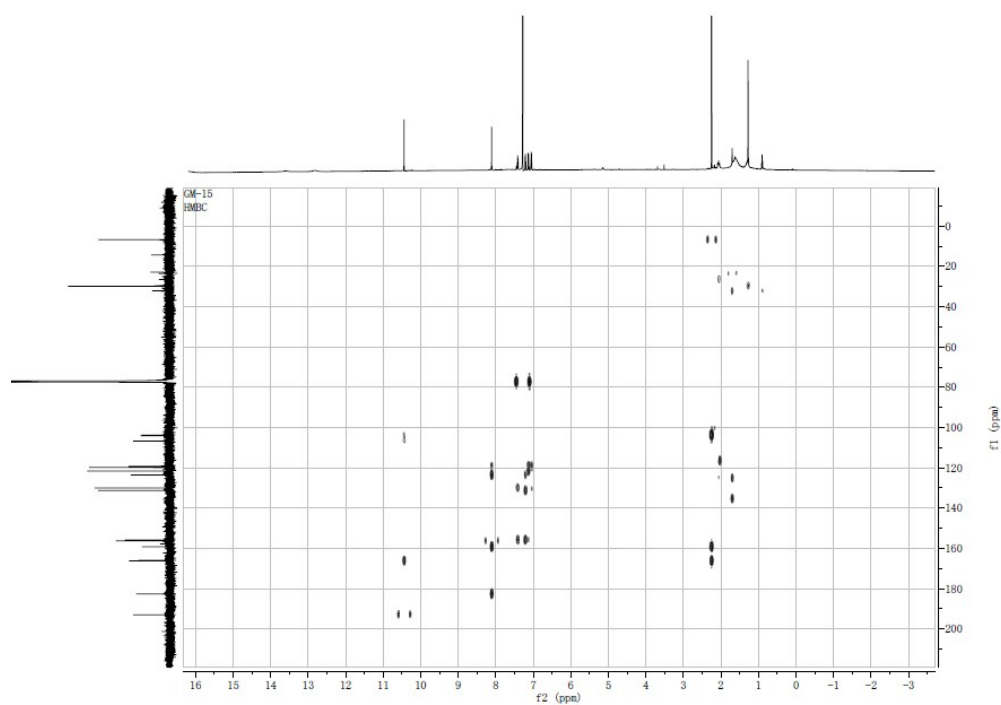

**Figure S62.** H-H COSY (600 MHz, CDCl<sub>3</sub>) spectrum of **8**

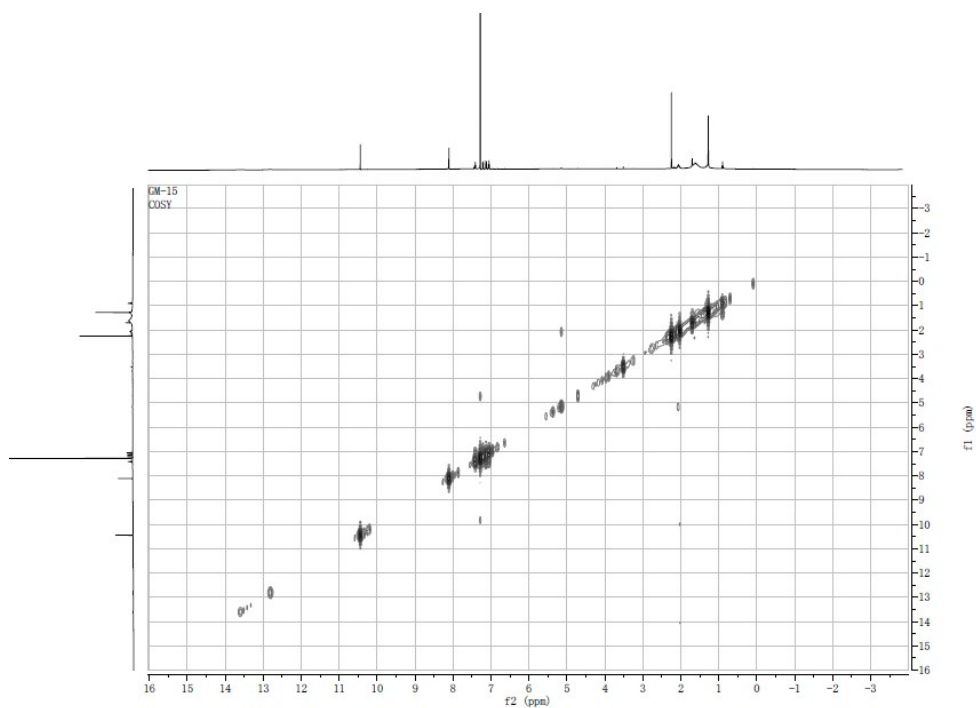

**Figure S63.** NOESY (600 MHz, CDCl<sub>3</sub>) spectrum of **8**

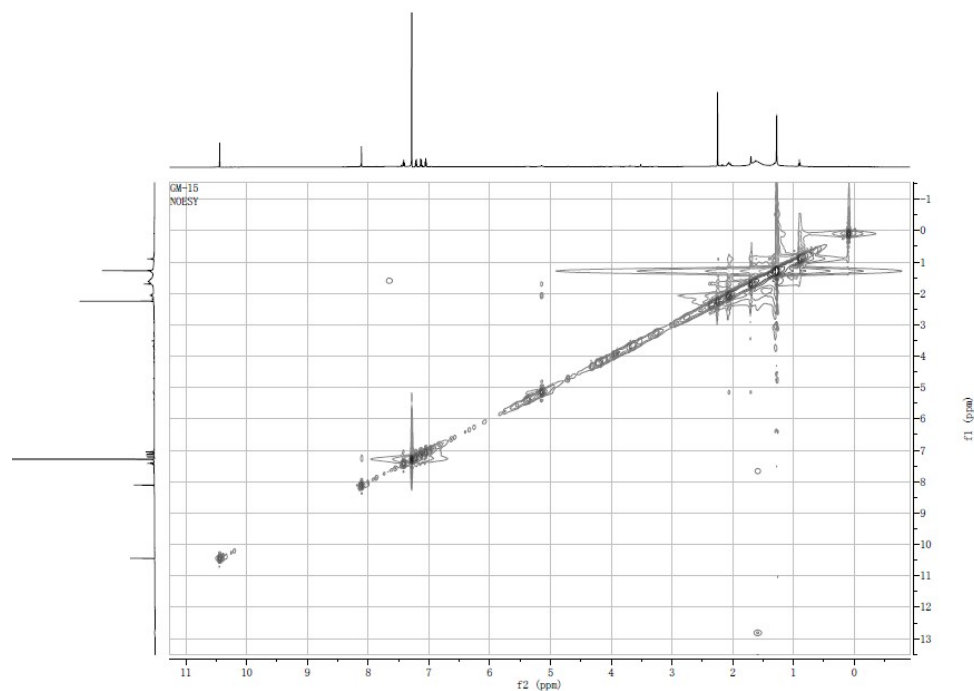

**Figure S64.** HRESIMS spectrum of **8**

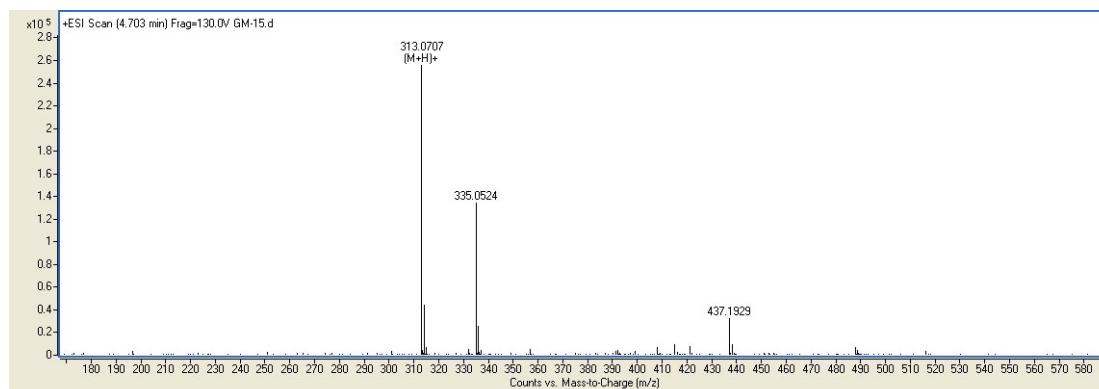

| No.      | Formula                                        | Ion Formula                                    | Measured m/z | Calc m/z | ppm |
|----------|------------------------------------------------|------------------------------------------------|--------------|----------|-----|
| <b>8</b> | C <sub>17</sub> H <sub>12</sub> O <sub>6</sub> | C <sub>17</sub> H <sub>13</sub> O <sub>6</sub> | 313.0707     | 313.0707 | 0   |

**Figure S65.**  $^1\text{H}$  NMR (600 MHz,  $\text{CDCl}_3$ ) spectrum of **9**

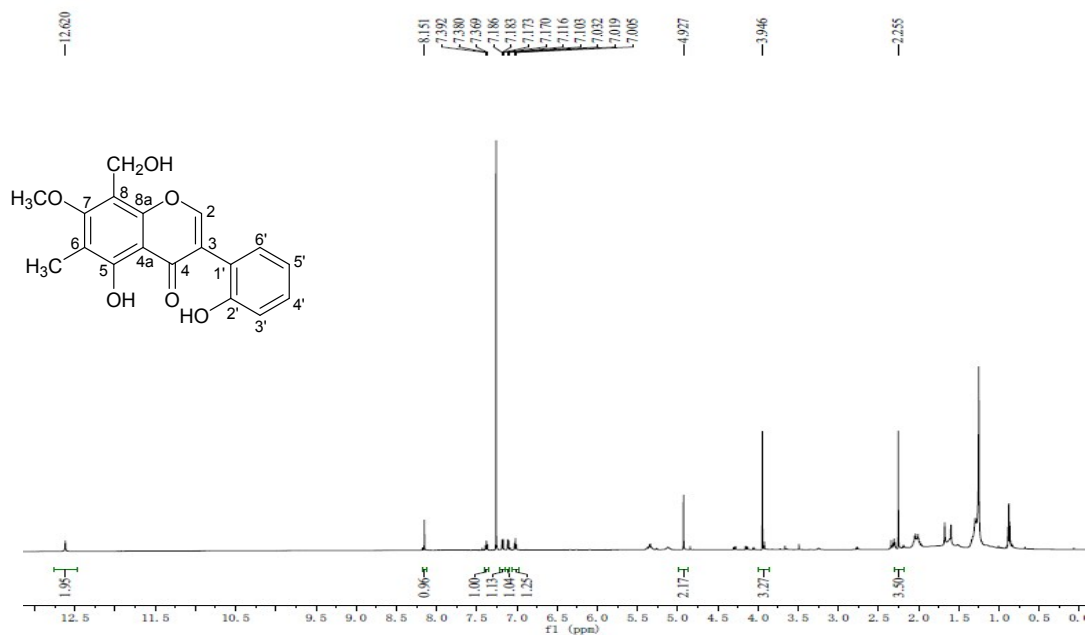

**Figure S66.**  $^{13}\text{C}$  NMR (150 MHz,  $\text{CDCl}_3$ ) spectrum of **9**

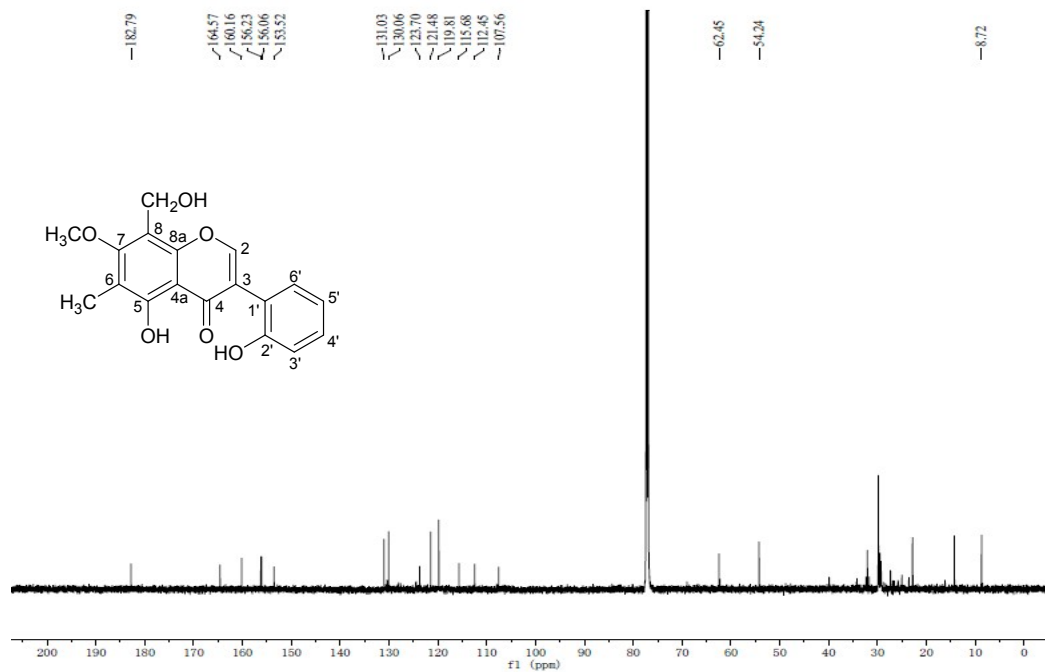



**Figure S67.** HSQC (600 MHz, CDCl<sub>3</sub>) spectrum of **9**

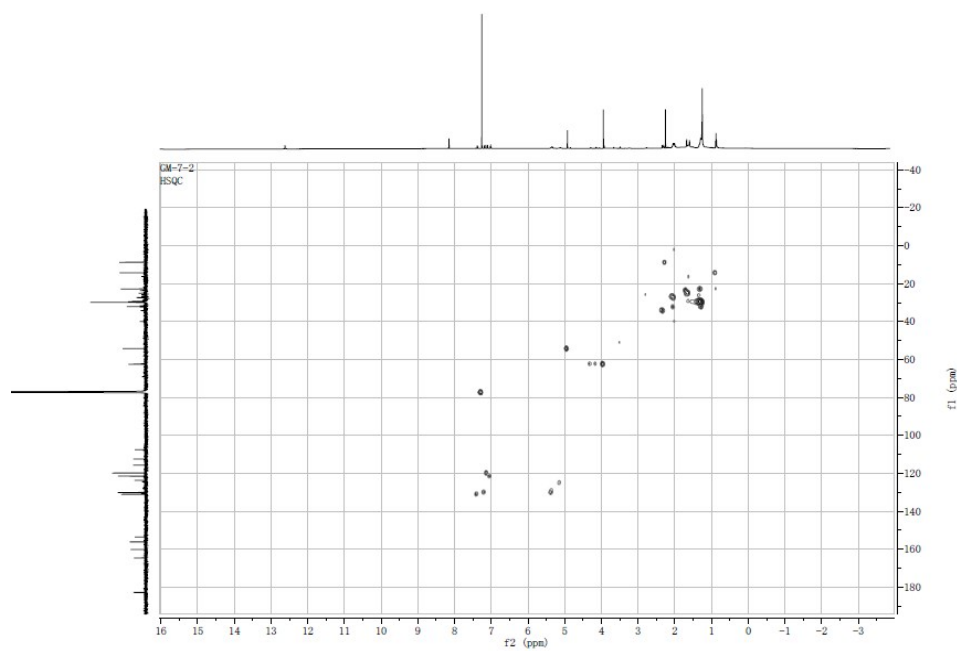

**Figure S68.** HMBC (600 MHz, CDCl<sub>3</sub>) spectrum of **9**

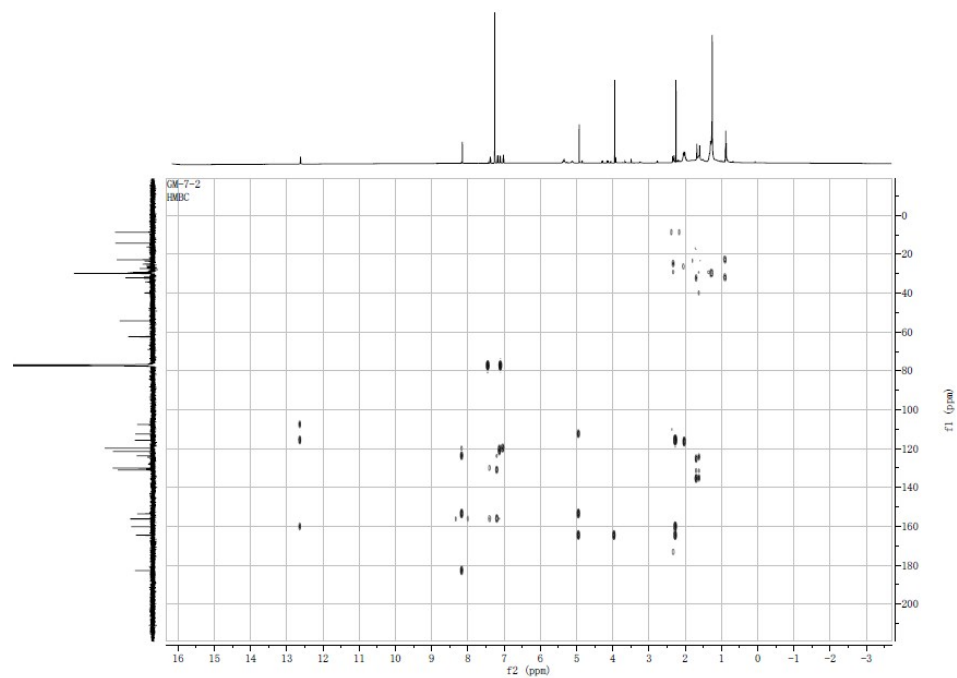

**Figure S69.** H-H COSY (600 MHz, CDCl<sub>3</sub>) spectrum of **9**

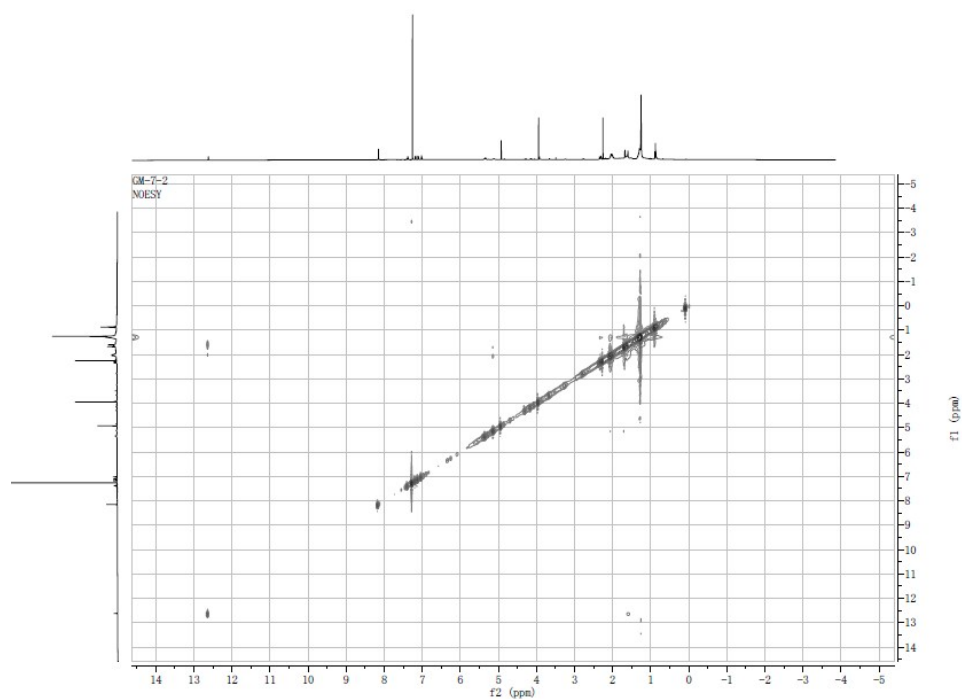

**Figure S70.** NOESY (600 MHz, CDCl<sub>3</sub>) spectrum of **9**

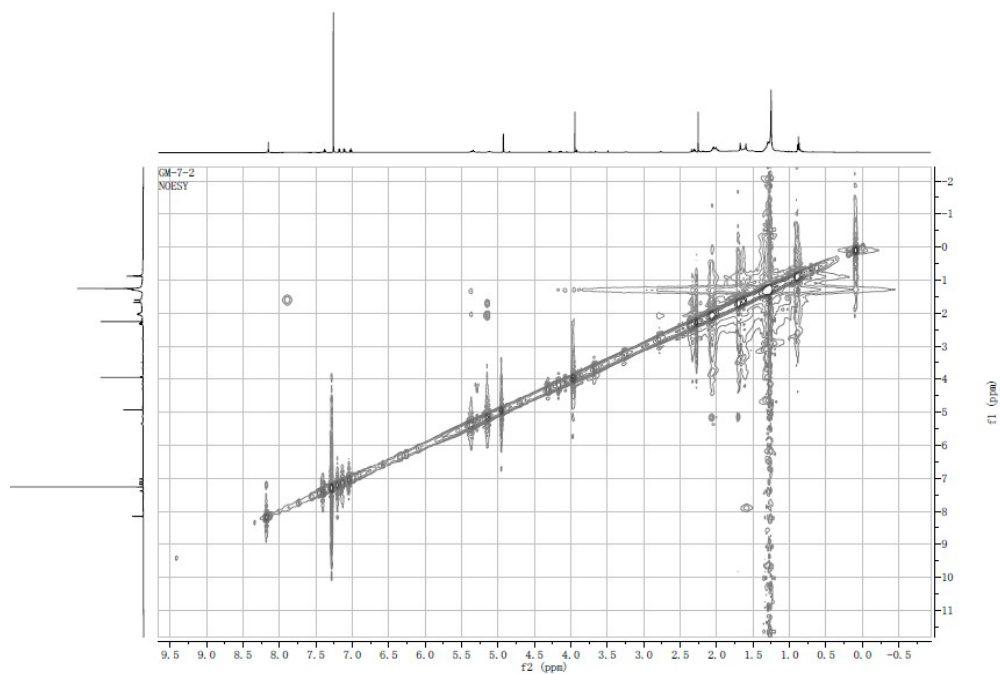

**Figure S71.** HRESIMS spectrum of **9**

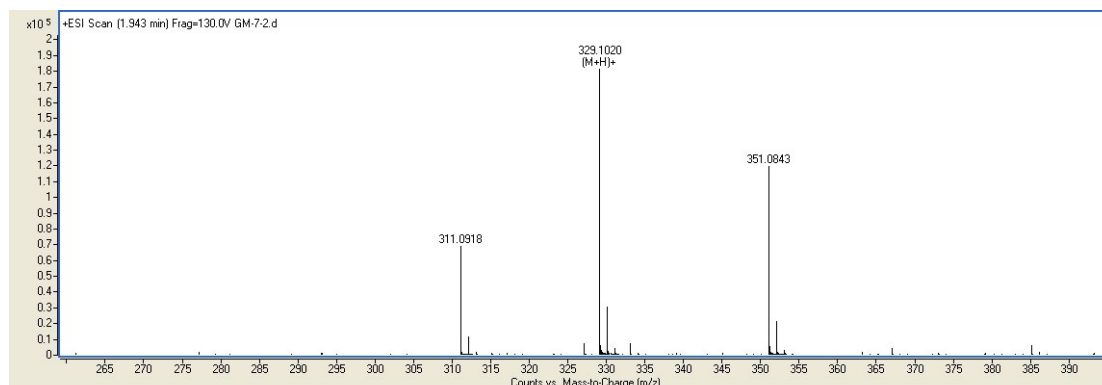

| No.      | Formula                                        | Ion Formula                                    | Measured m/z | Calc m/z | ppm |
|----------|------------------------------------------------|------------------------------------------------|--------------|----------|-----|
| <b>9</b> | C <sub>18</sub> H <sub>16</sub> O <sub>6</sub> | C <sub>18</sub> H <sub>17</sub> O <sub>6</sub> | 329.1020     | 329.1020 | 0   |

**Figure S72.** <sup>1</sup>H NMR (600 MHz, CDCl<sub>3</sub>) spectrum of **10**

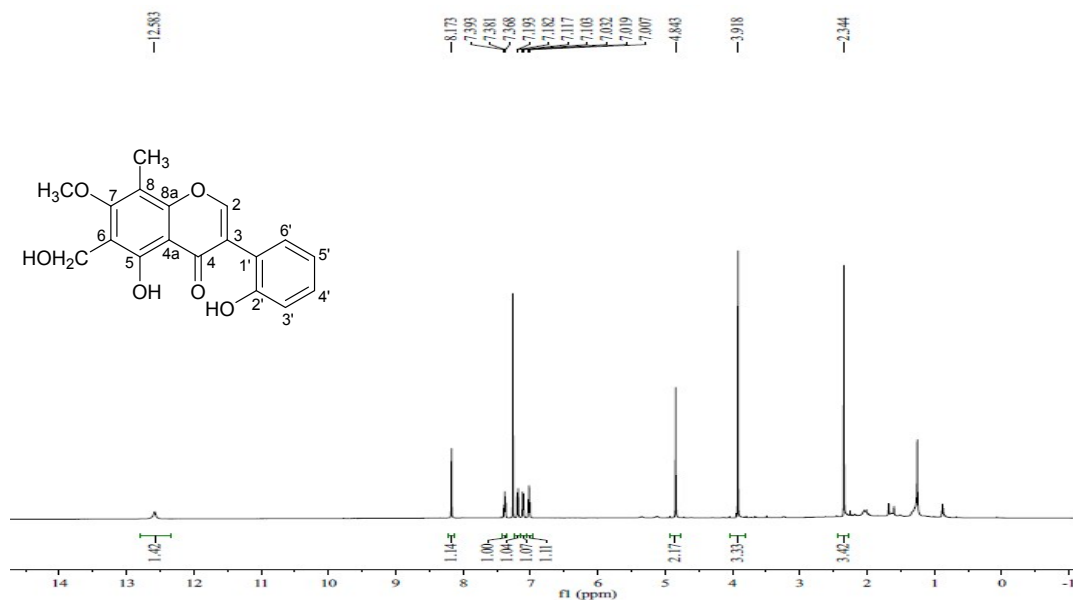

**Figure S73.**  $^{13}\text{C}$  NMR (150 MHz,  $\text{CDCl}_3$ ) spectrum of **10**

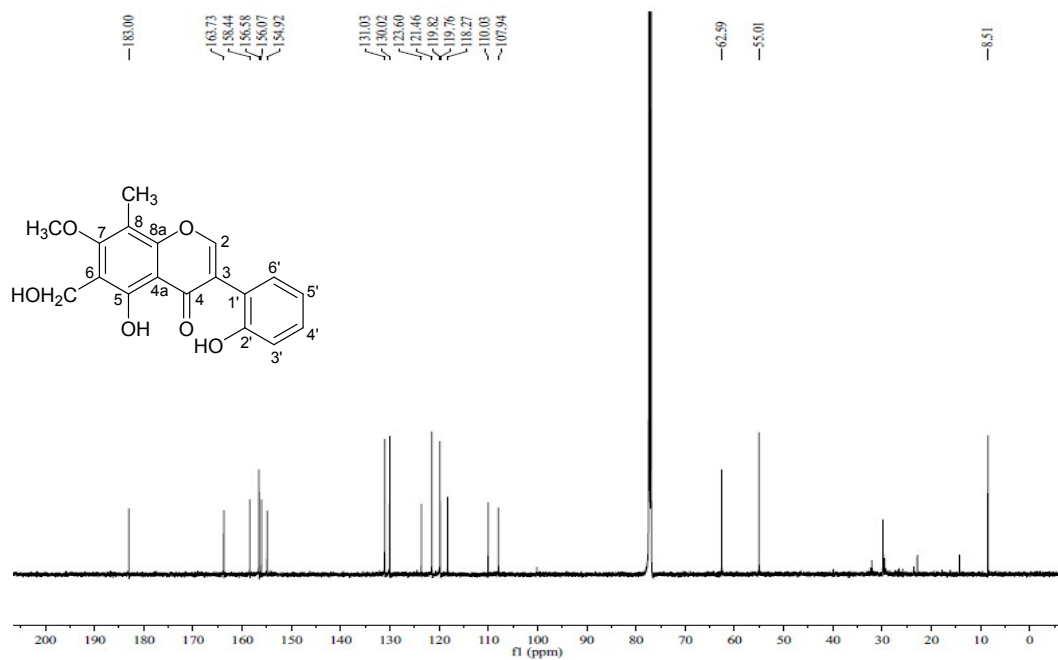

**Figure S74.** HSQC (600 MHz,  $\text{CDCl}_3$ ) spectrum of **10**

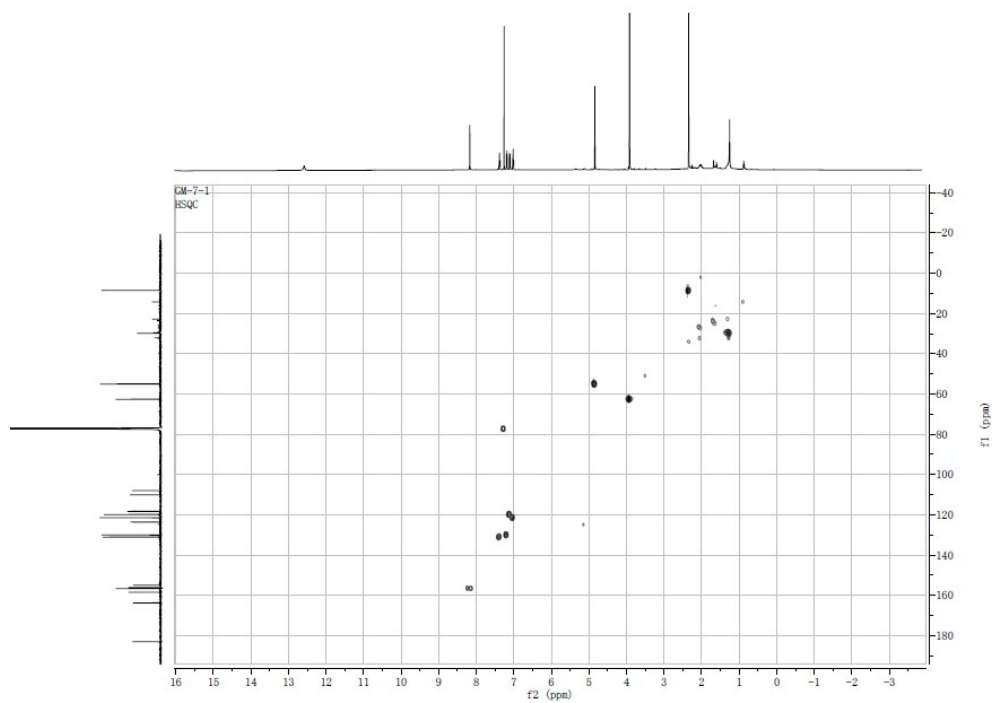

**Figure S75.** HMBC (600 MHz, CDCl<sub>3</sub>) spectrum of **10**

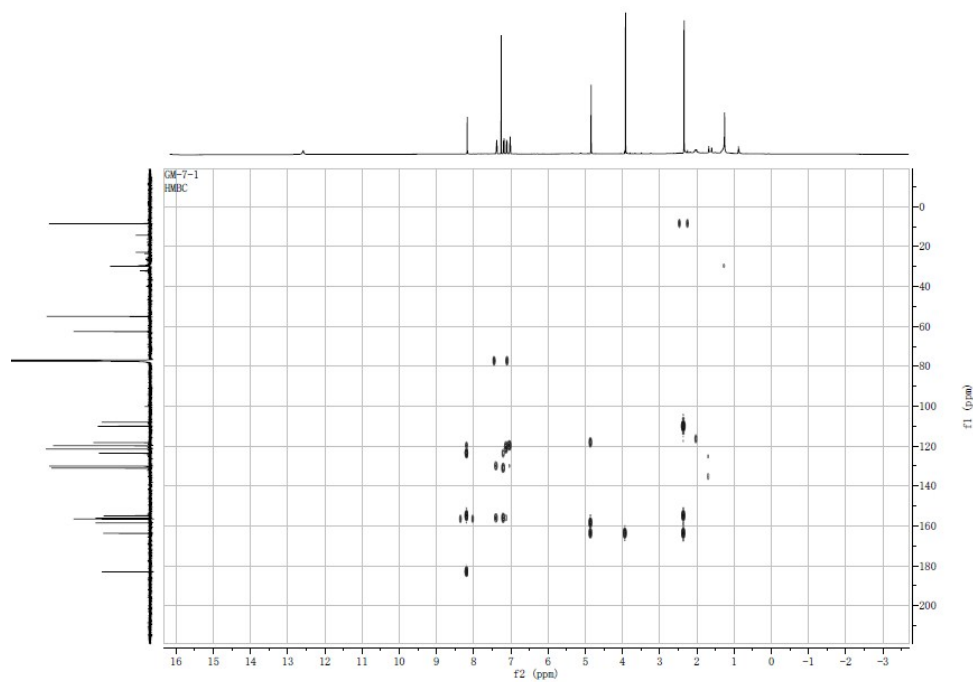

**Figure S76.** H-H COSY (600 MHz, CDCl<sub>3</sub>) spectrum of **10**

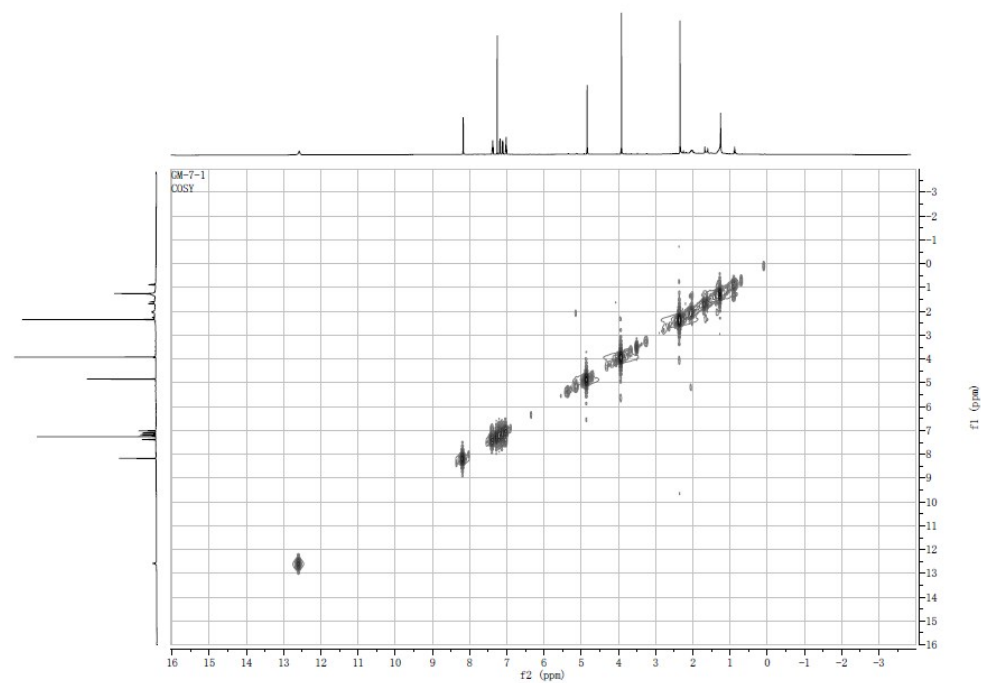

**Figure S77.** NOESY (600 MHz, CDCl<sub>3</sub>) spectrum of **10**

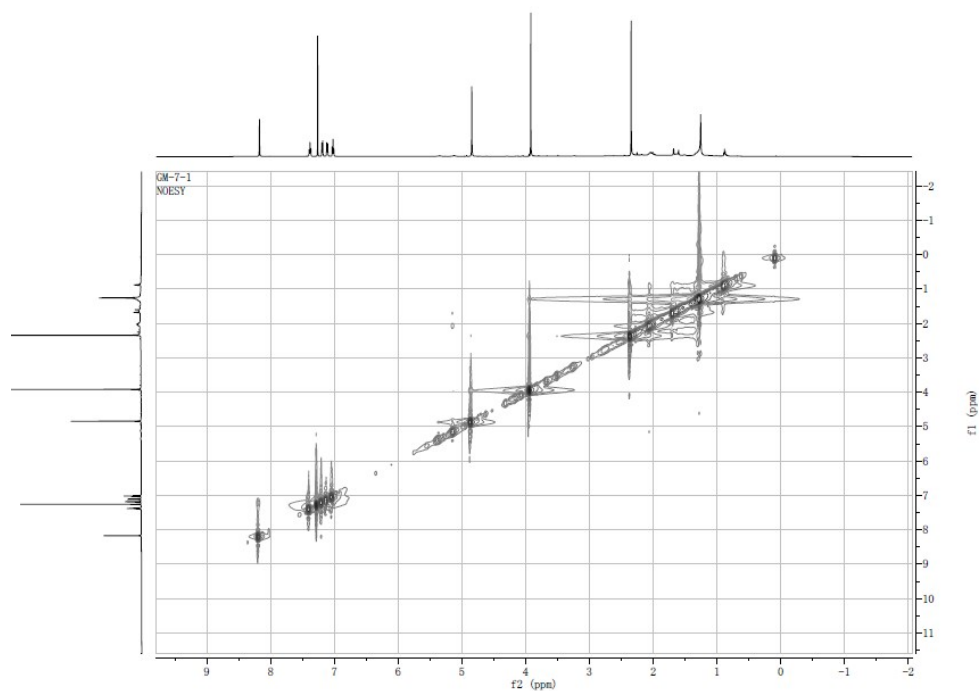

**Figure S78.** HRESIMS spectrum of **10**

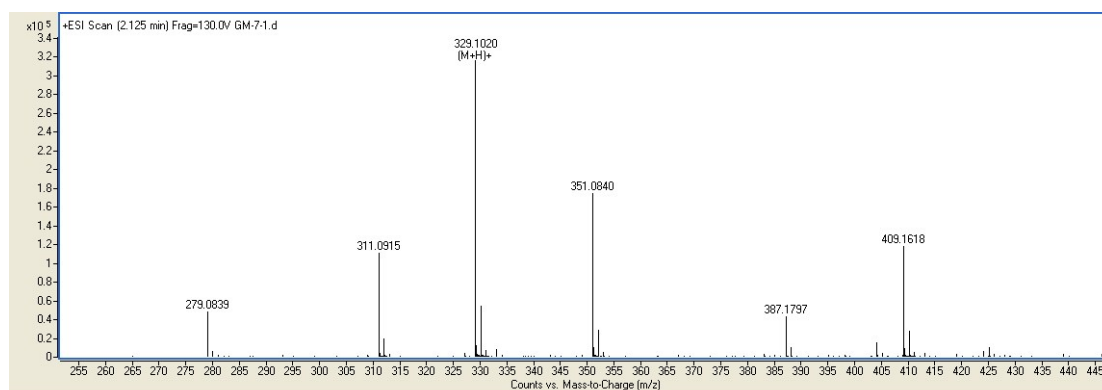

| No.       | Formula           | Ion Formula       | Measured m/z | Calc m/z | ppm |
|-----------|-------------------|-------------------|--------------|----------|-----|
| <b>10</b> | $C_{18}H_{16}O_6$ | $C_{18}H_{17}O_6$ | 329.1020     | 329.1020 | 0   |
